# Supplementary material for: New Insights into 4-Anilinoquinazolines as Inhibitors of Cardiac Troponin I–Interacting Kinase (TNNi3K)
Source: PubMed Central journal article supplement (PMC7180948; doi:10.3390/molecules25071697), 2020-04-07
Supplement: molecules-25-01697-s001.pdf [file molecules-25-01697-s001.pdf]

- 1. Characterisation of compounds 2, 7, 12, 13, 15-20**
- 2. LabBook Codes and SMILES for 2, 7, 15-17, 20**
- 3. KINOMEScan® results of 7**
- 4. KINOMEScan® results of 15**
- 5. Mass Spectrometry Method**

# 1. Compound Characterisation

## 4-(dimethylamino)-*N*-methyl-3-nitrobenzene-1-sulfonamide (**12**)

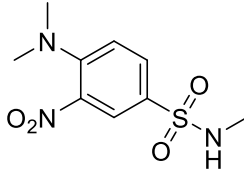

RT: 0.00 - 11.25

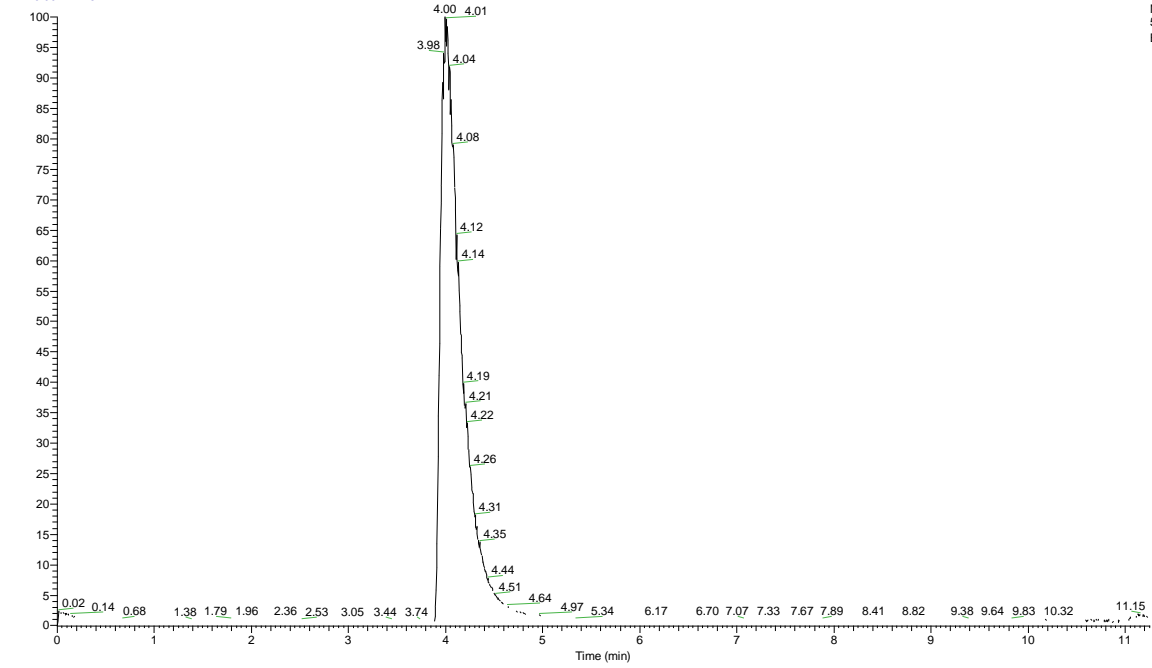

NL:  
5.91E9  
Base Peak  
MS CA466

CA466 #779-812 RT: 3.95-4.11 AV: 34 NL: 4.52E9  
T: FTMS + pESI Full ms [150.0000-2000.0000]

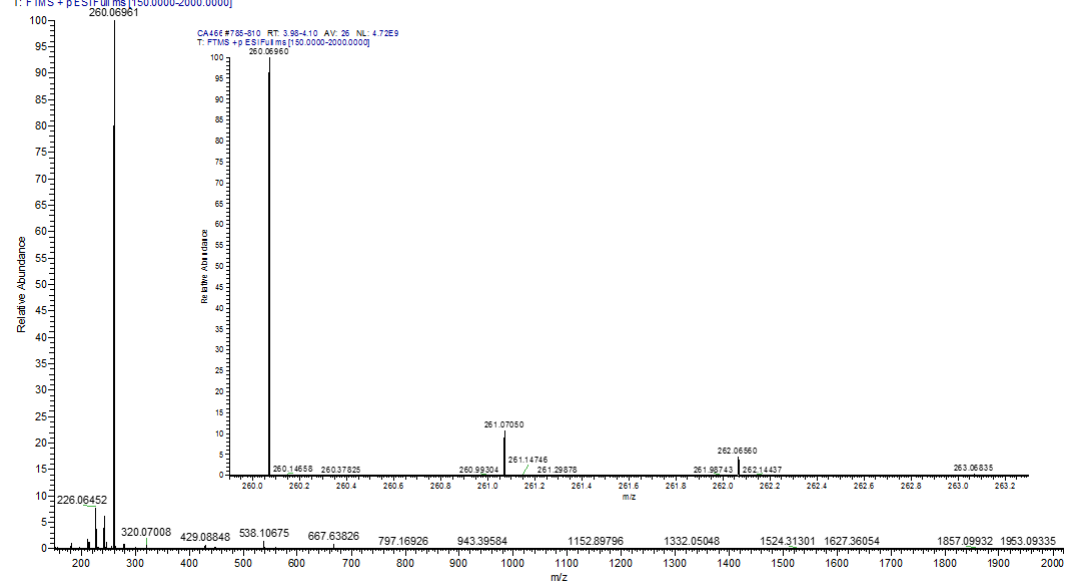

CA466\_010\_PROTON\_001

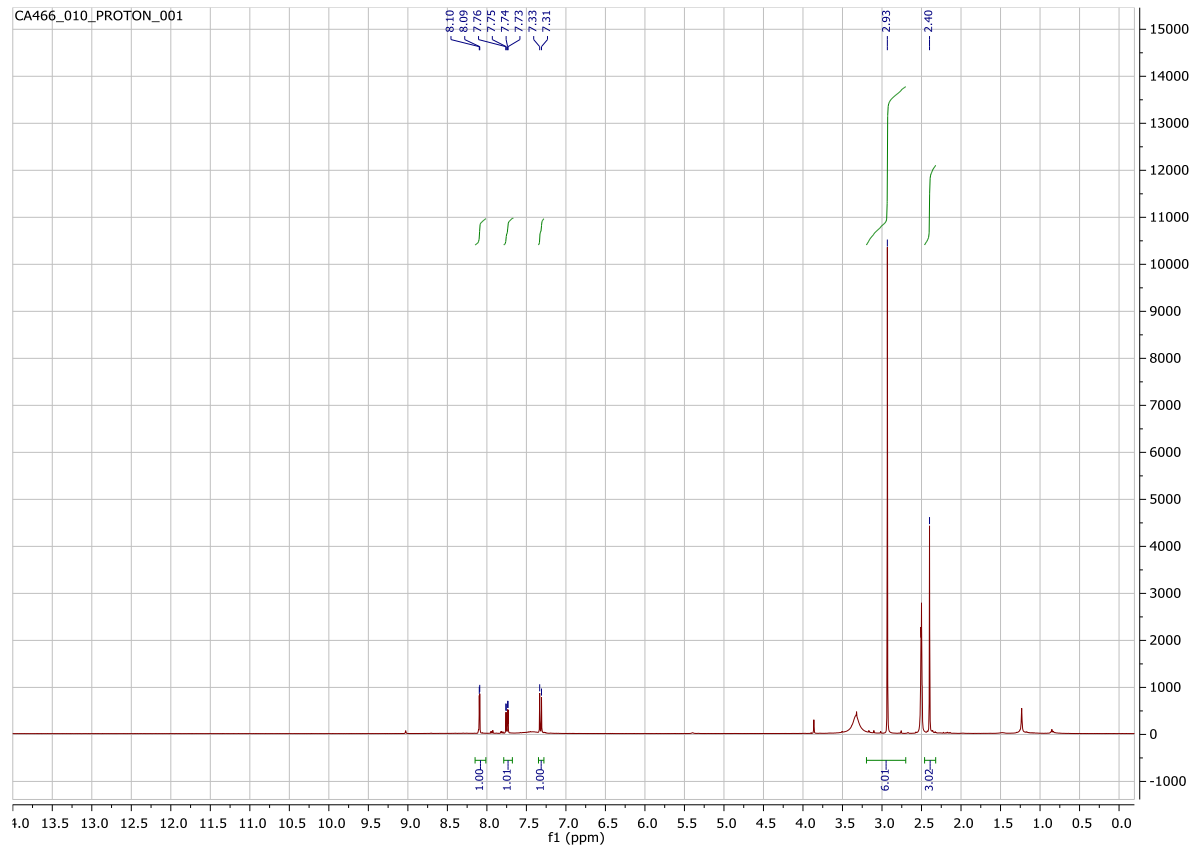

### 3-amino-4-(dimethylamino)-*N*-methylbenzene-1-sulfonamide (**13**)

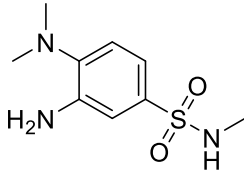

RT: 0.00 - 11.26

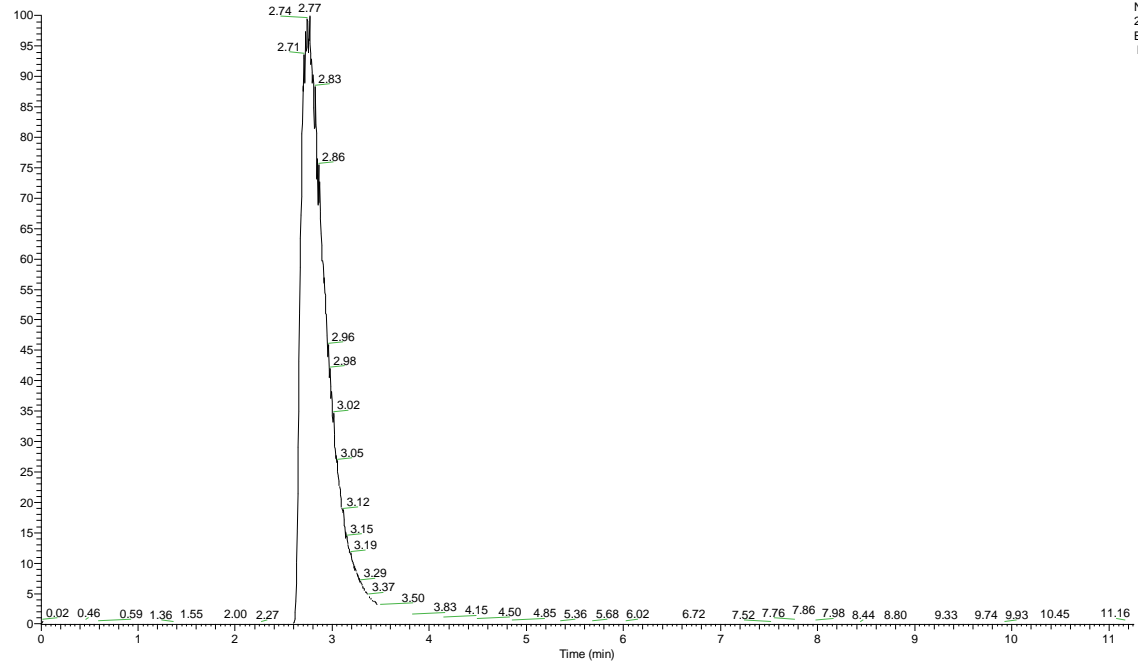

NL:  
2.60E10  
Base Peak  
MS CA467

CA467 #533-882 RT: 2.69-2.93 AV: 50 NL: 1.52E10  
T: FTMS + p ESI Full ms [150.0000-2000.0000]

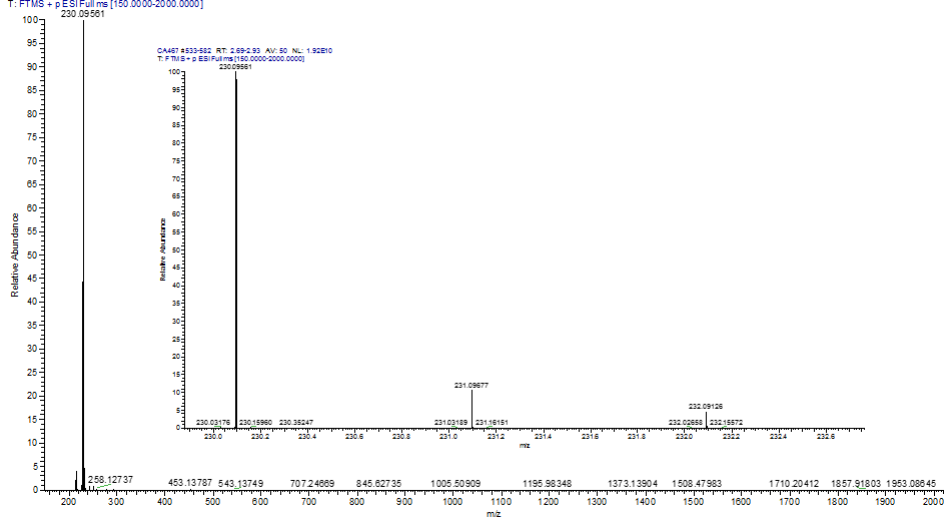

CA467\_010\_PROTON\_001

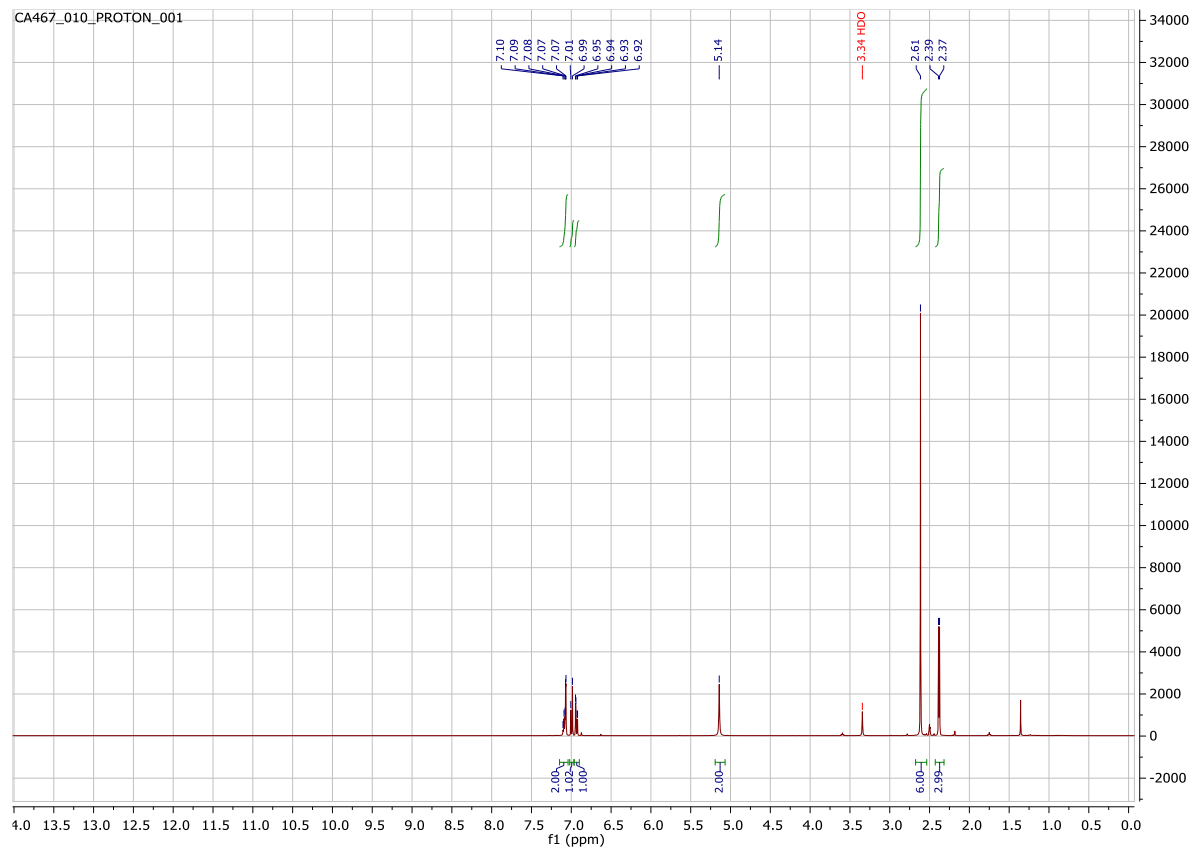

3-((6,7-dimethoxyquinazolin-4-yl)amino)-4-(dimethylamino)-*N*-methylbenzenesulfonamide (**7**)

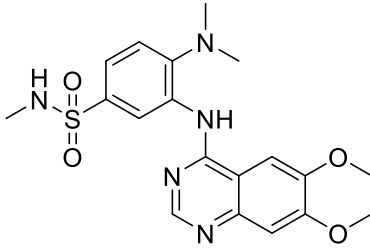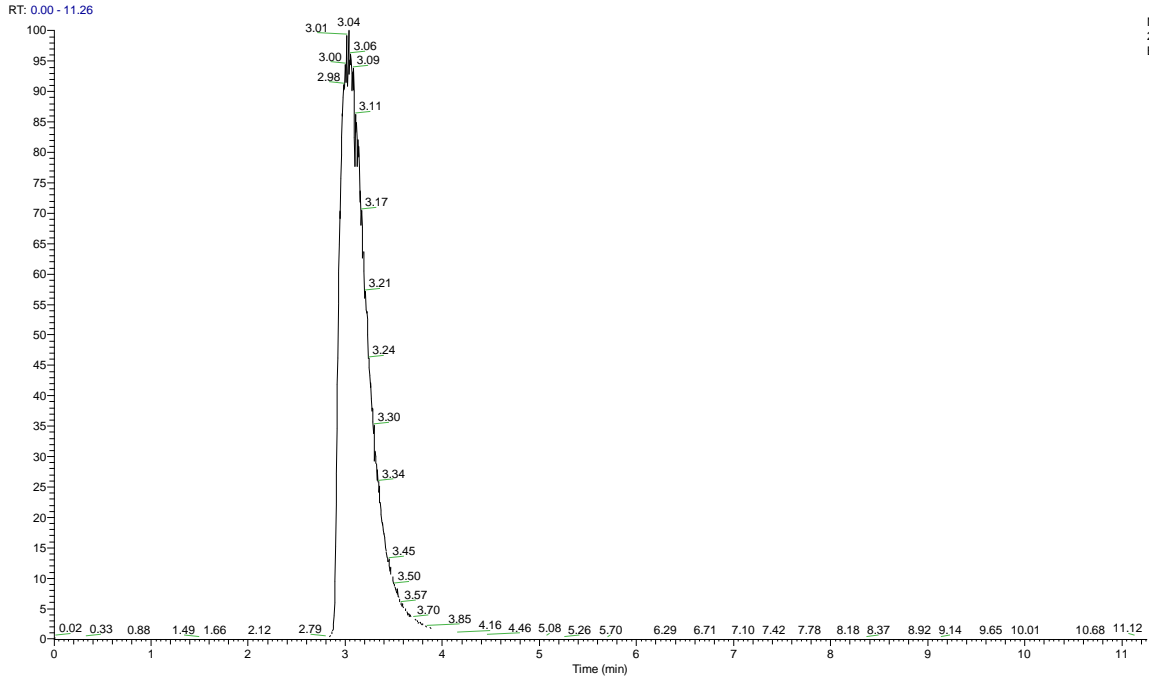

NL:  
2.86E10  
Base Peak  
MS CA471

CA471 #581642 RT: 2.94-3.24 AV: 62 NL: 2.11E10  
T: FTMS → p E SI Ful ms [150.0000-2000.0000]

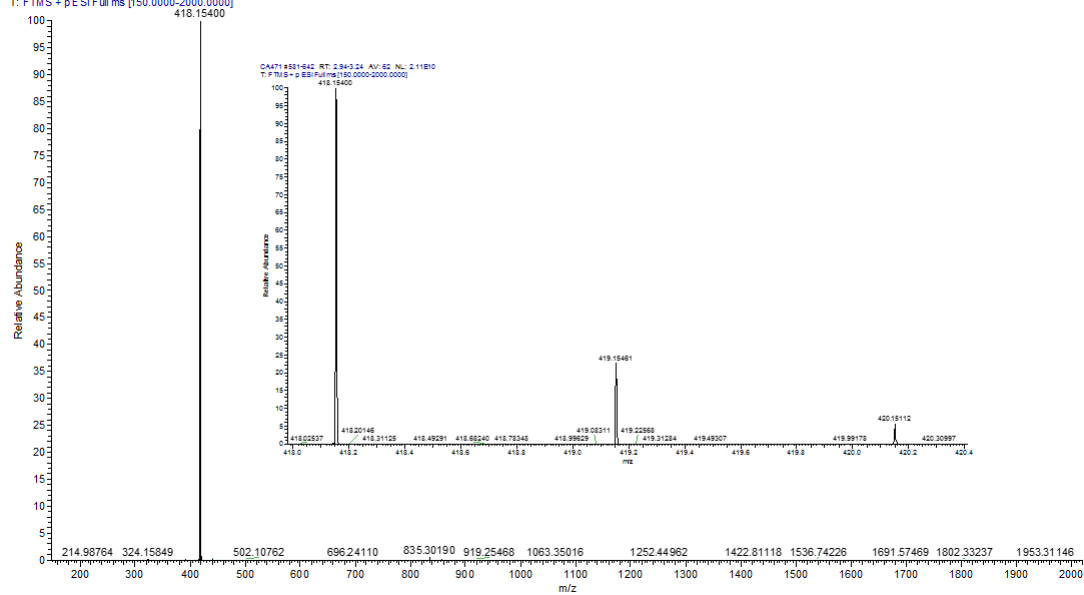

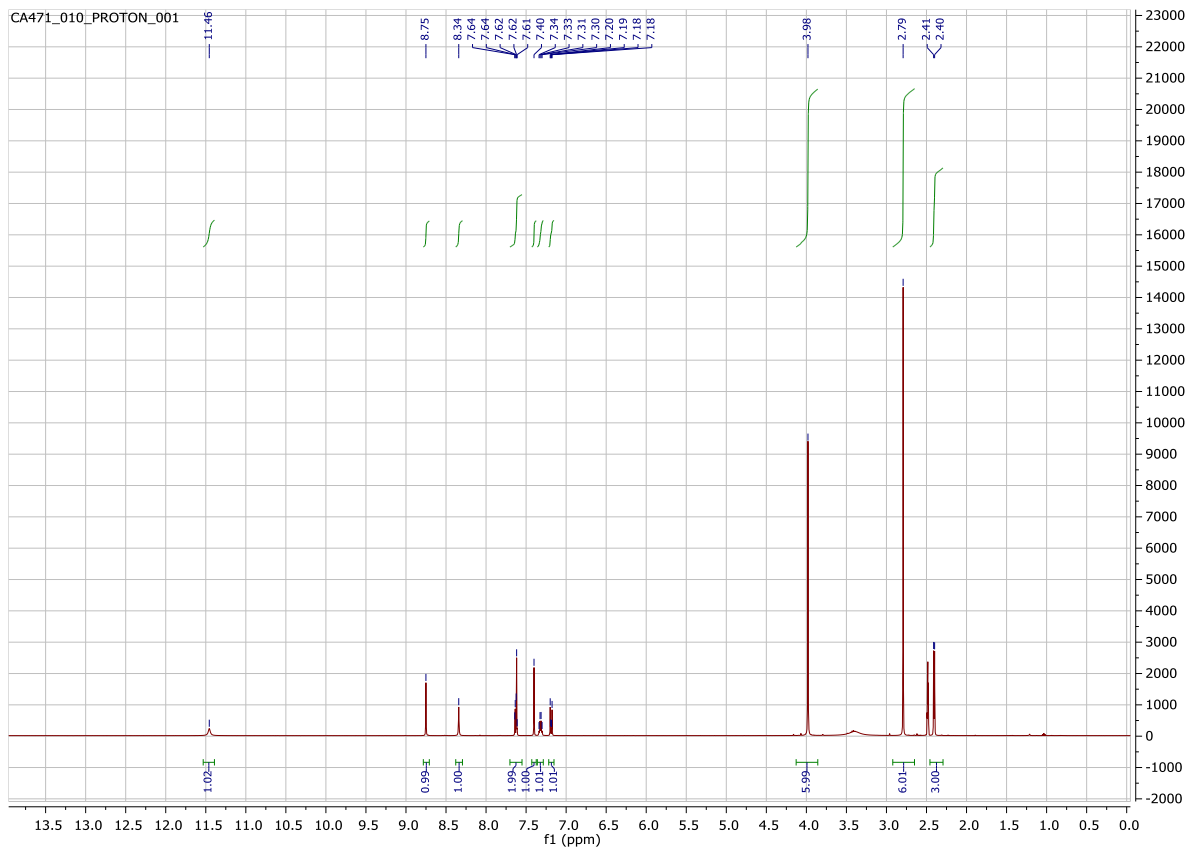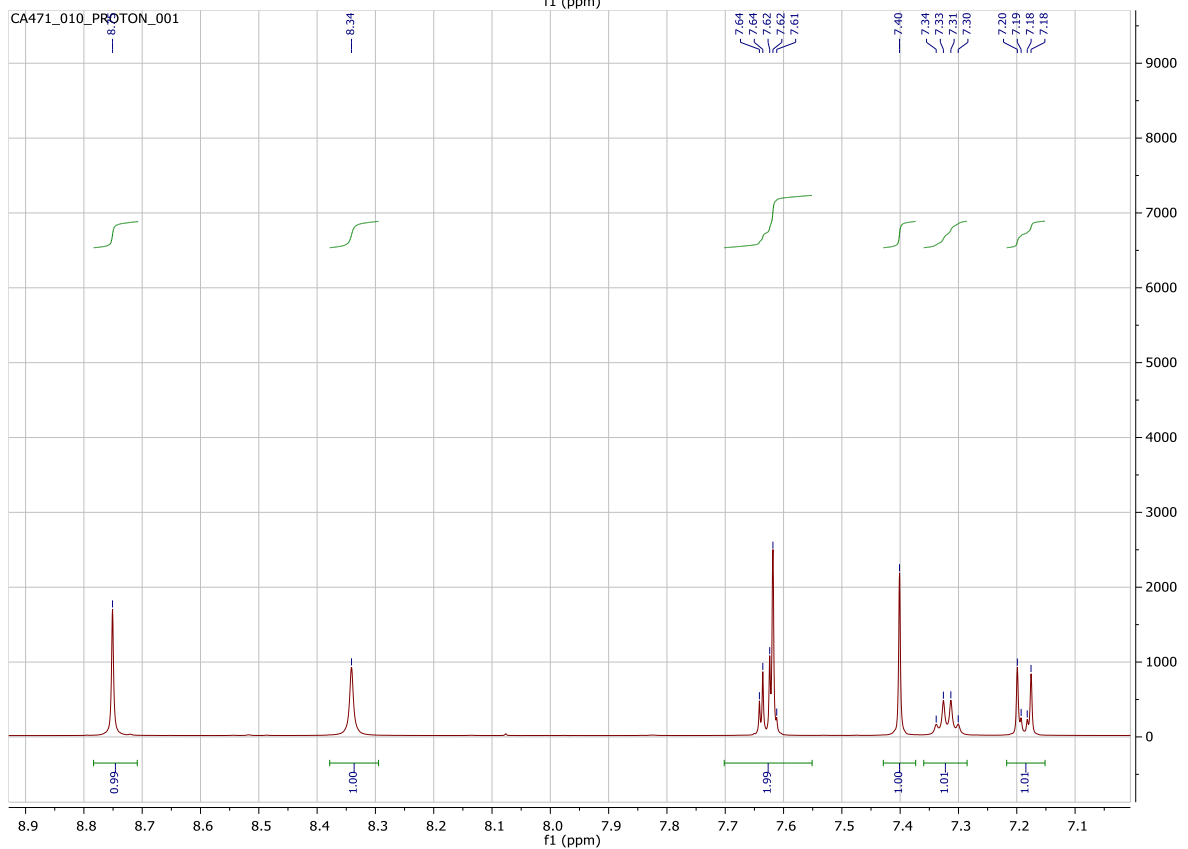

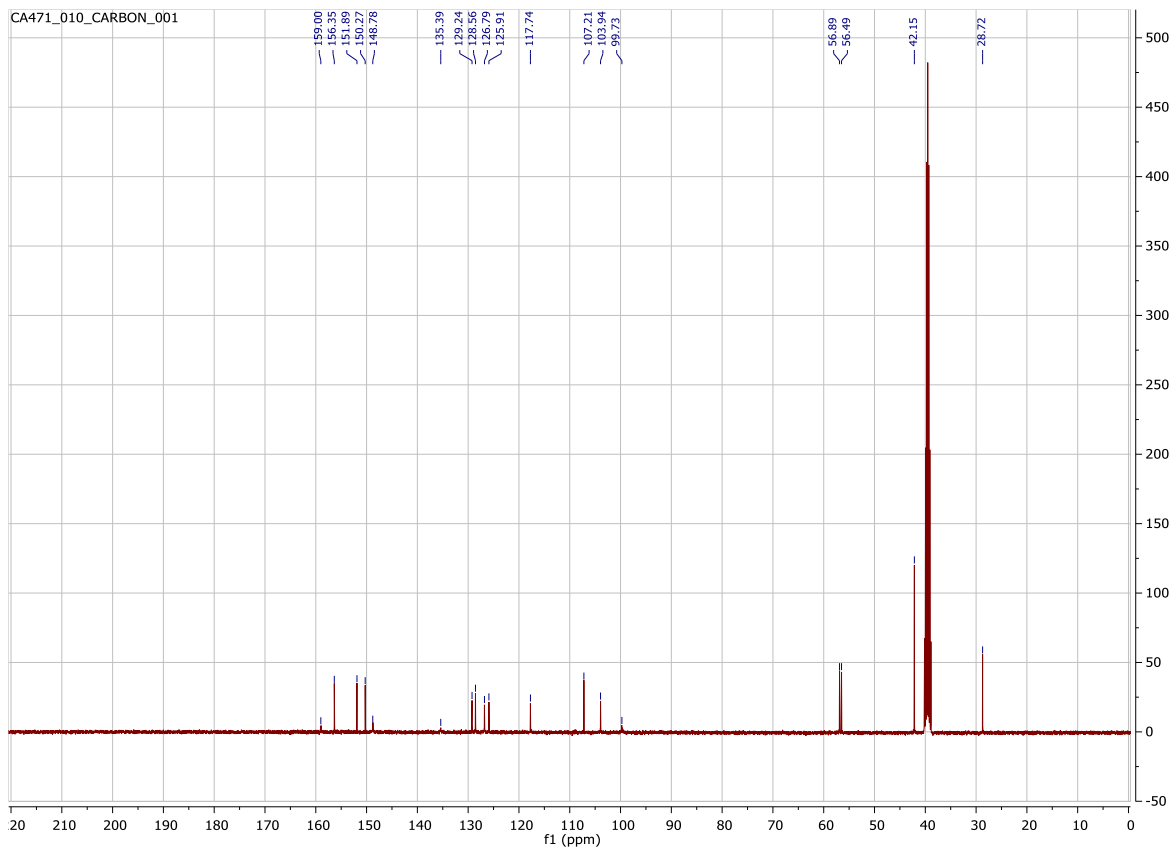





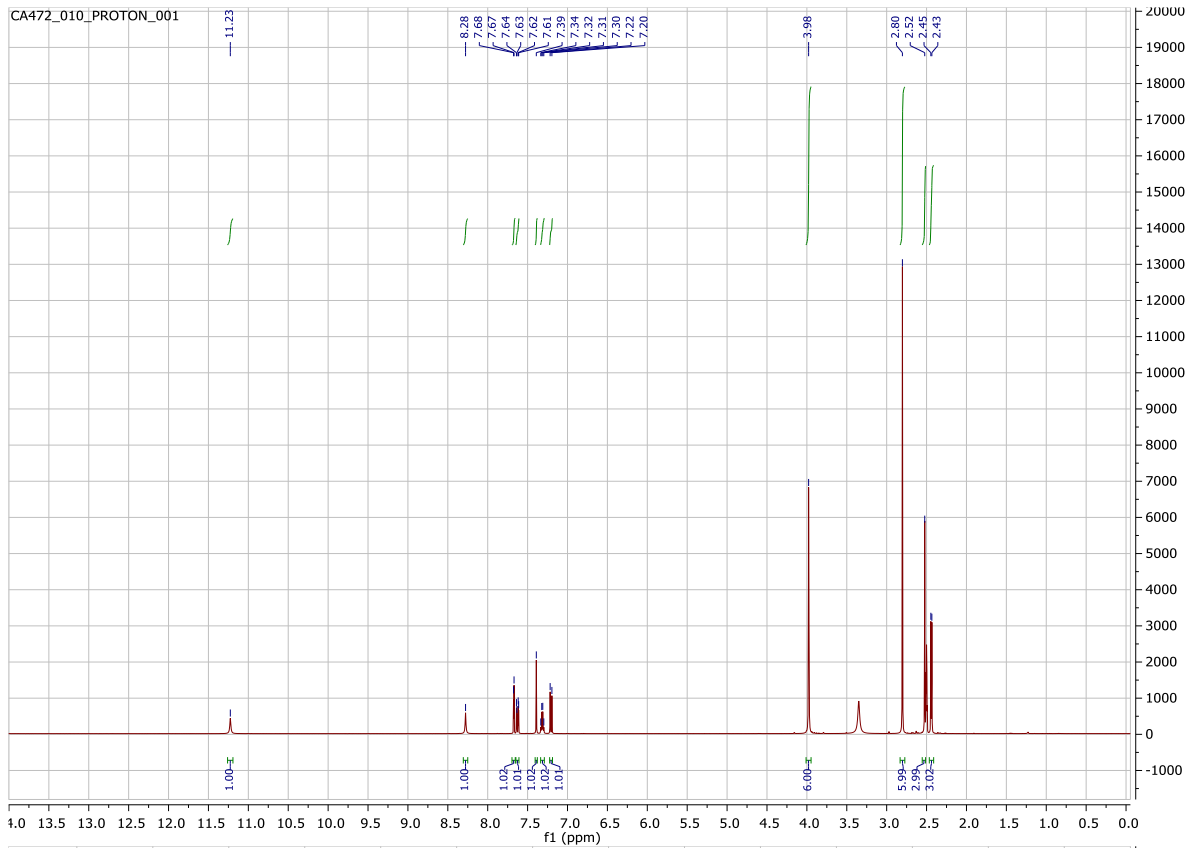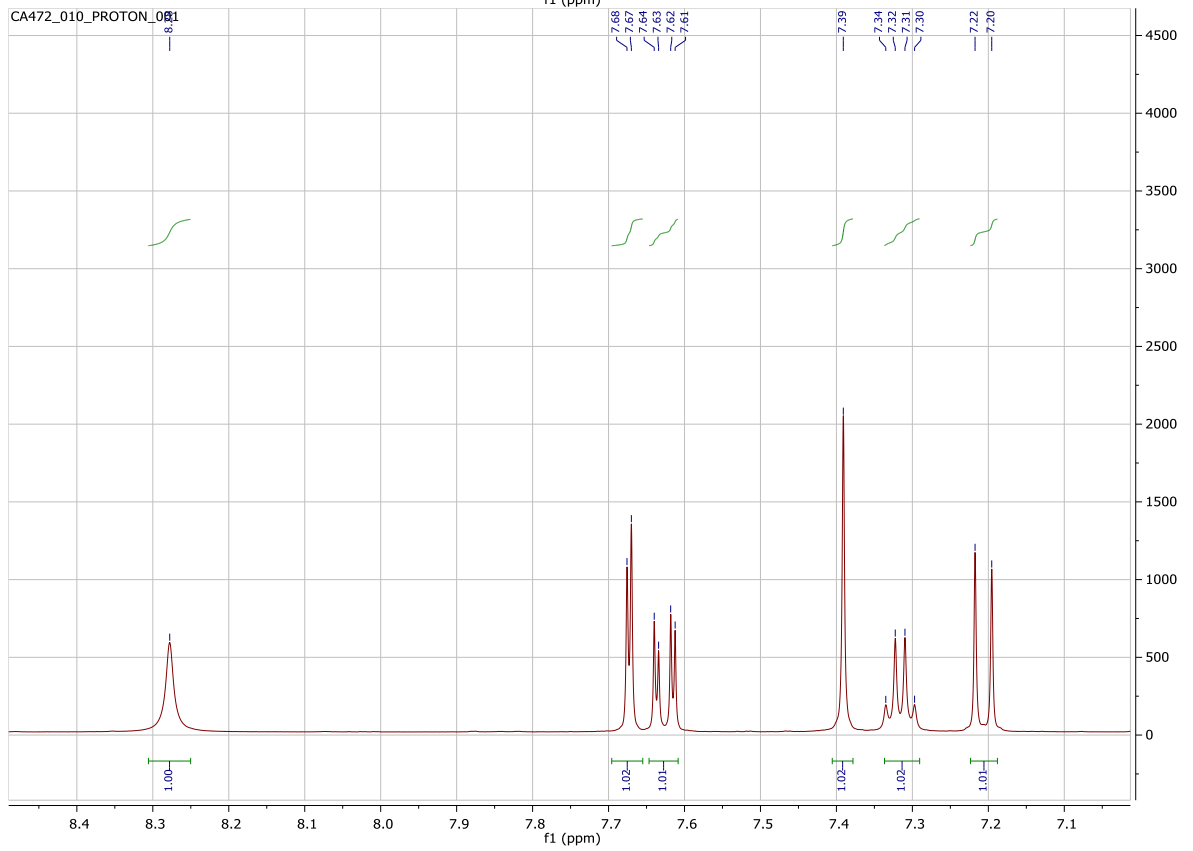

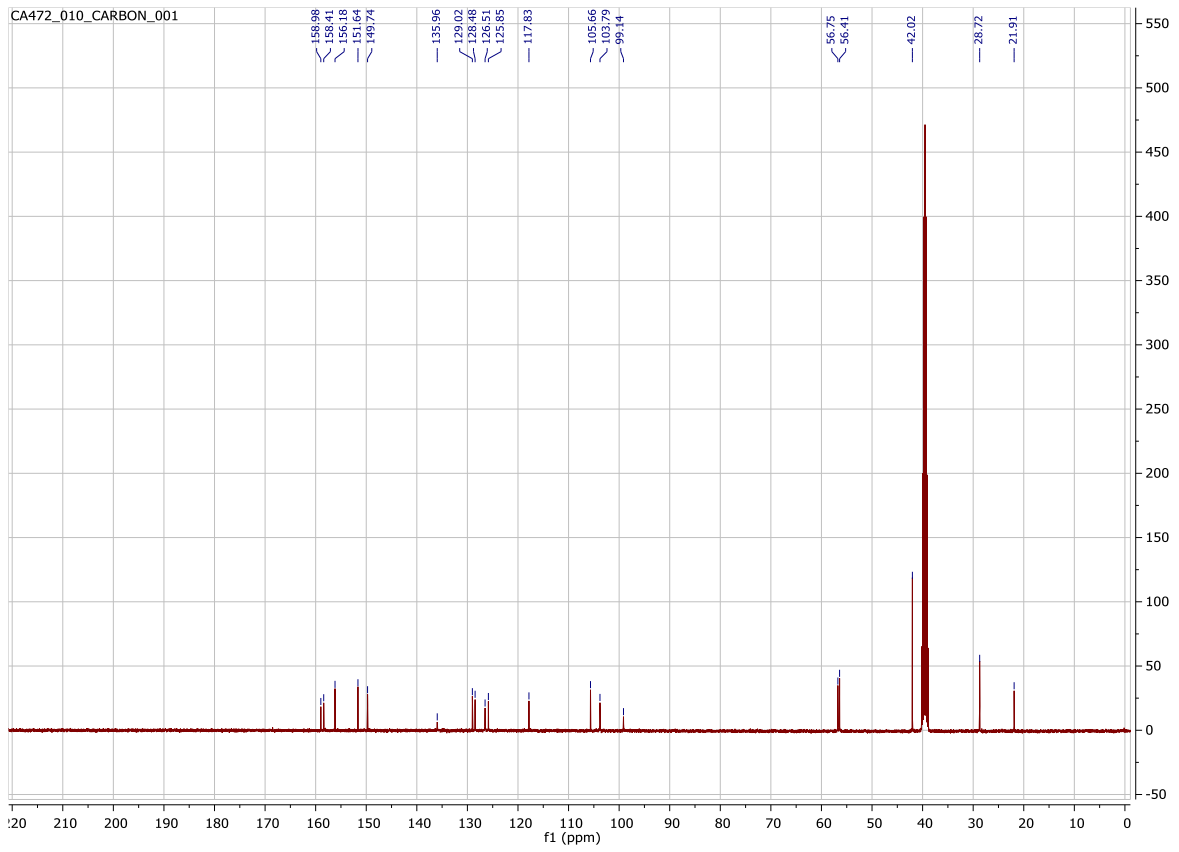

4-(dimethylamino)-3-((6-methoxyquinazolin-4-yl)amino)-*N*-methylbenzenesulfonamide (**16**)

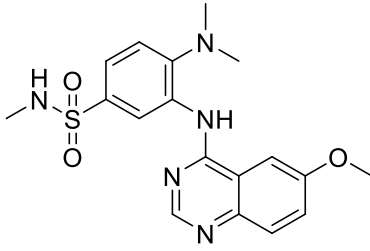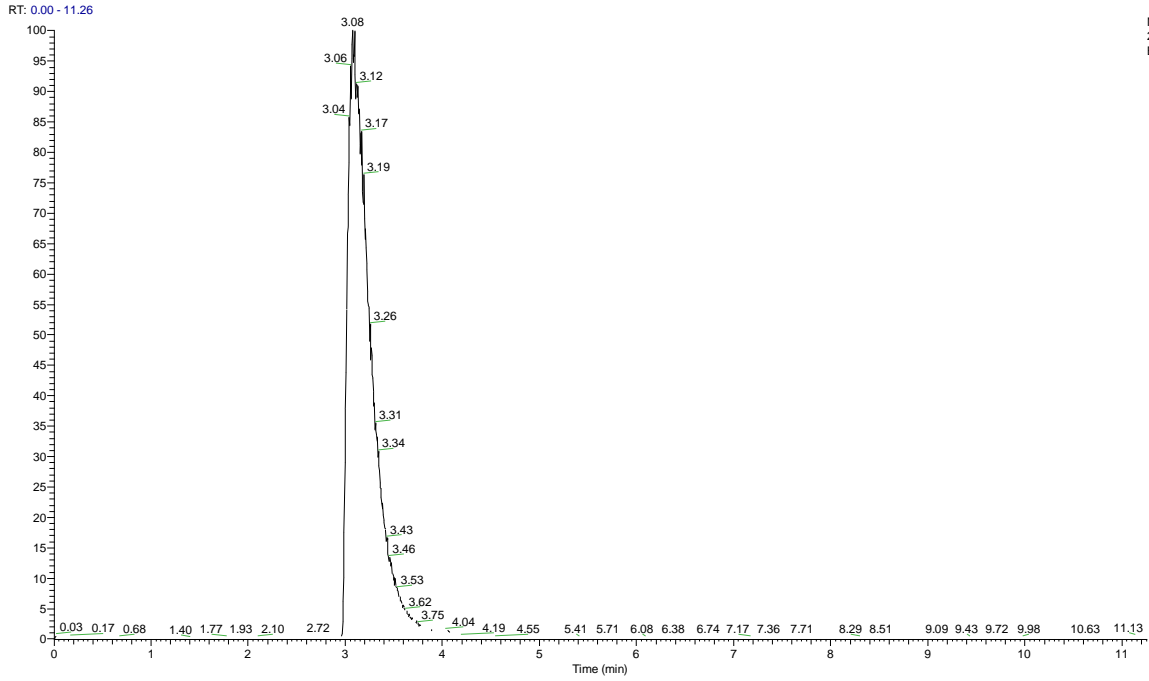

NL:  
2.21E10  
Base Peak  
MS CA475

CA475 #597655 RT: 3.02-3.31 AU: 59 NL: 1.49E10  
T: FTMS + p ESI Full ms [150,0000-2000,0000]

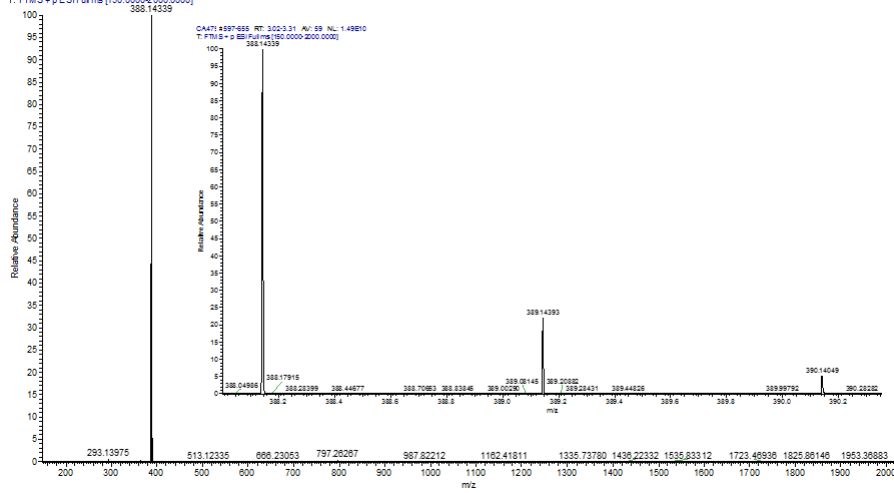

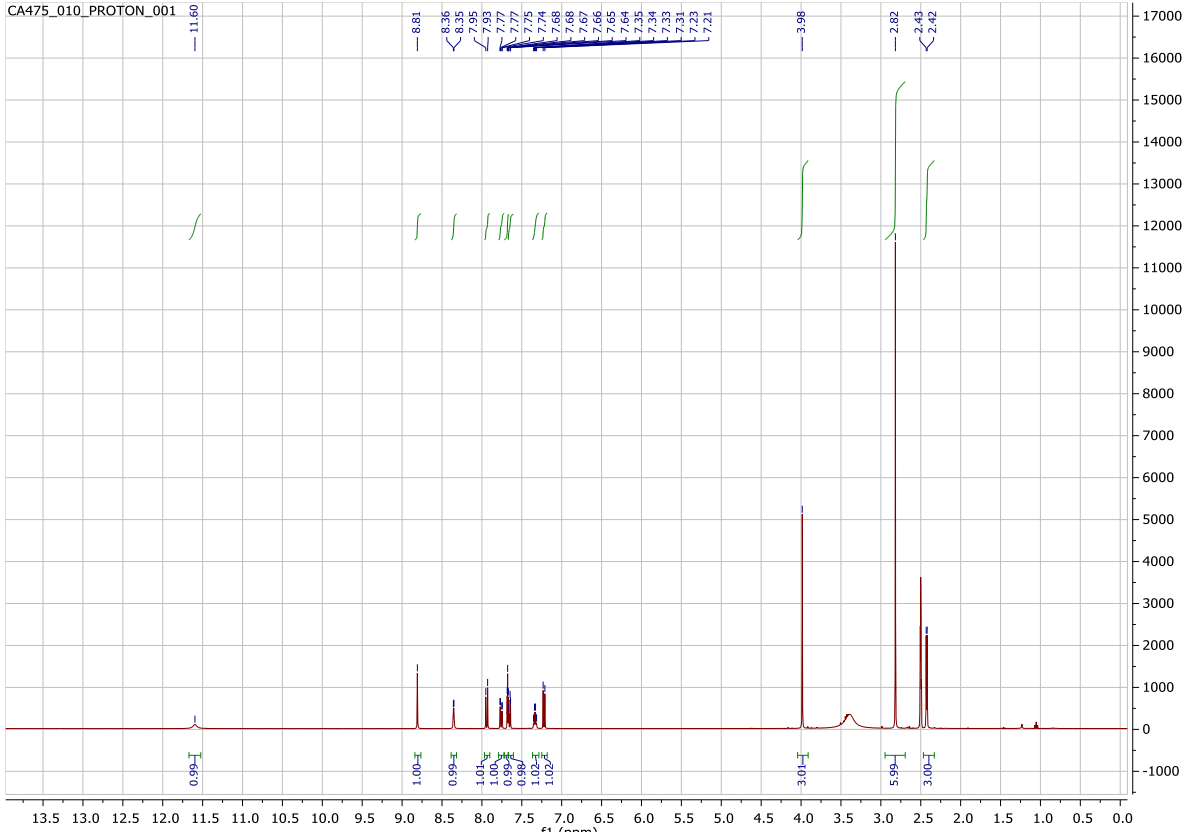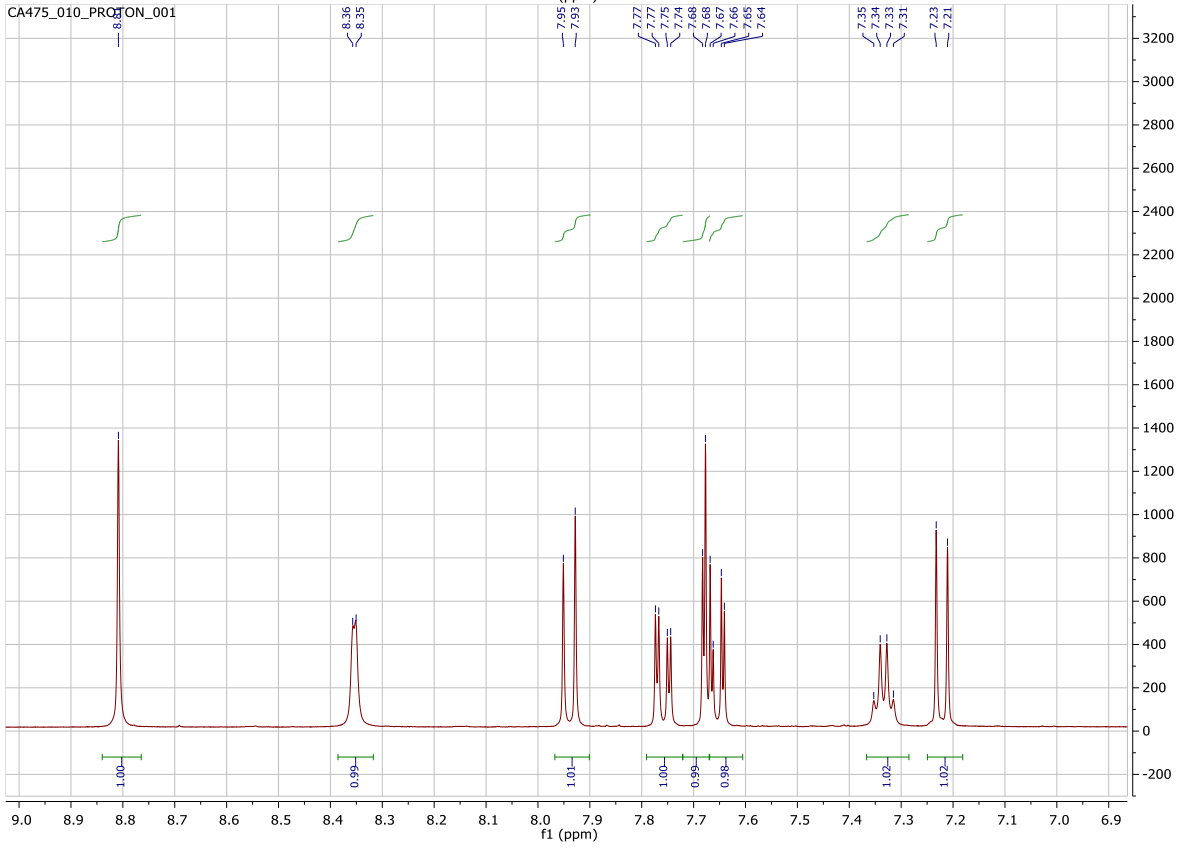

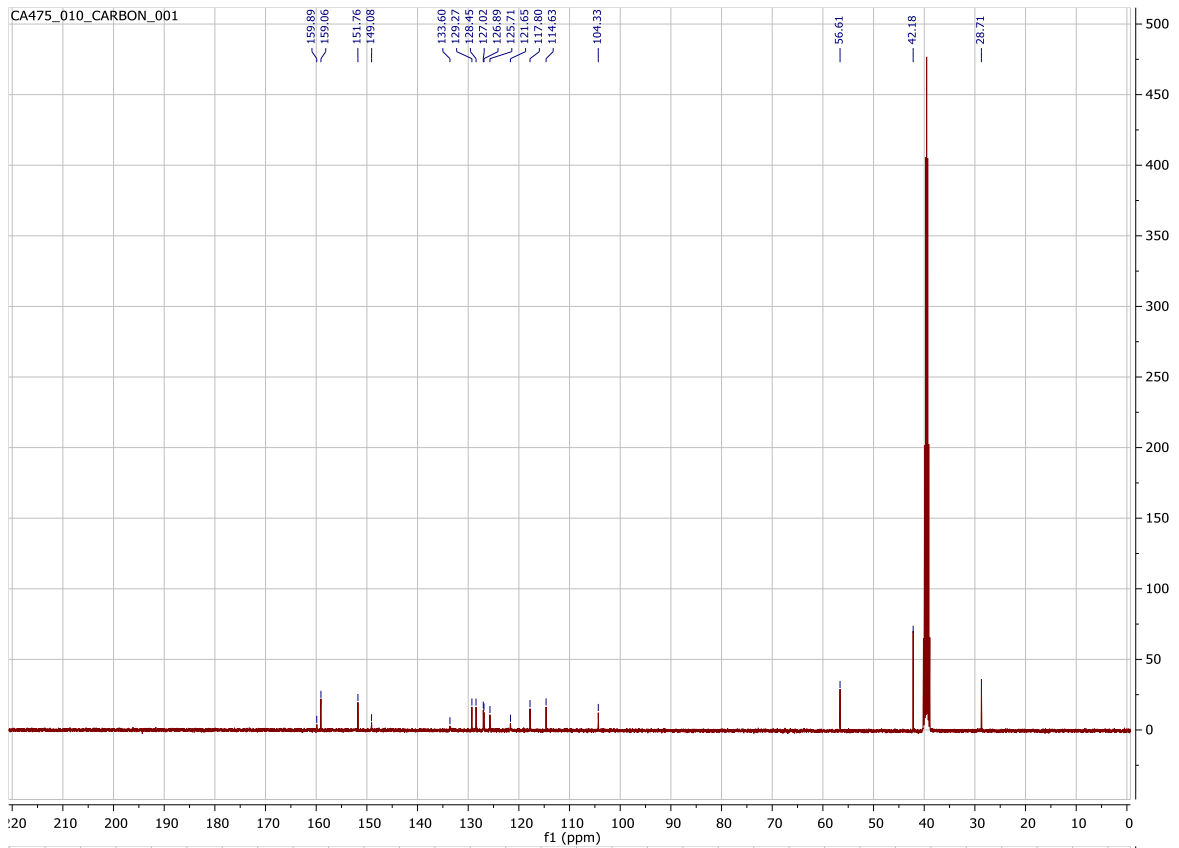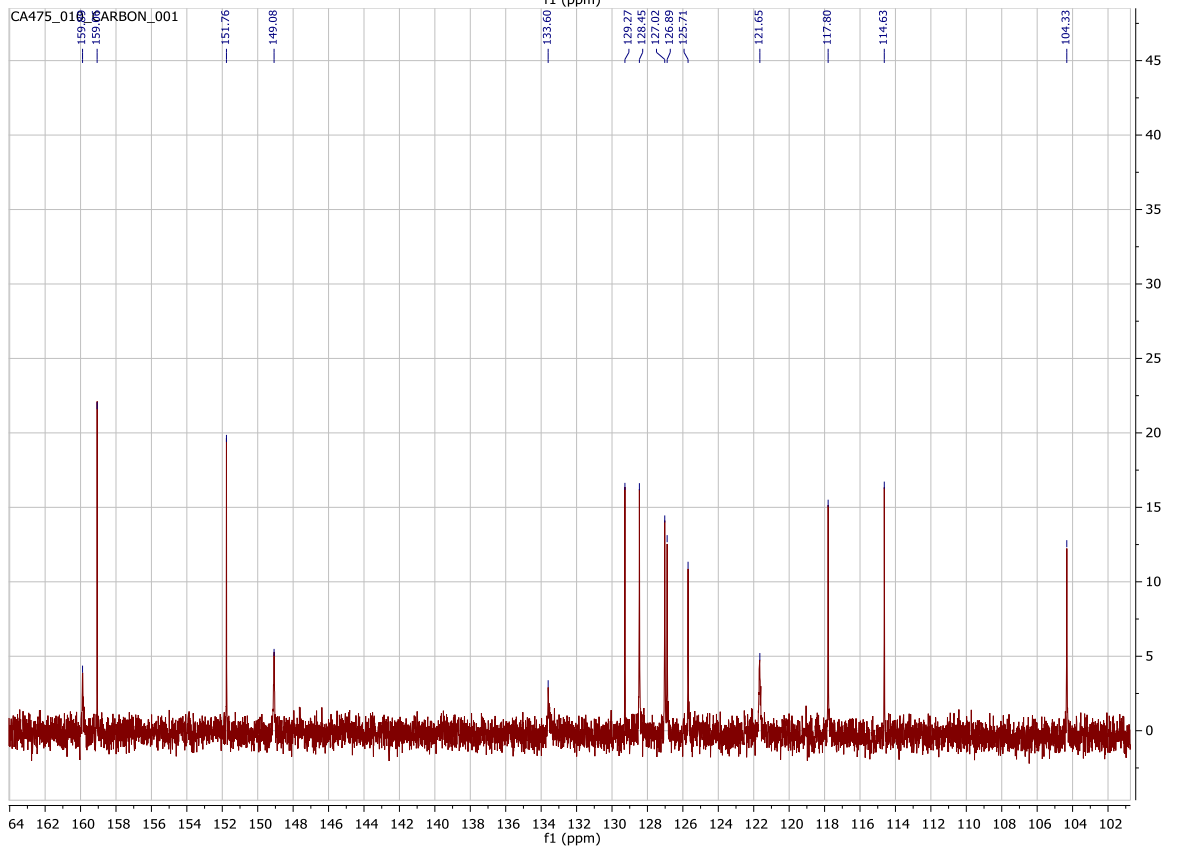

# 4-(dimethylamino)-3-((7-methoxyquinazolin-4-yl)amino)-*N*-methylbenzenesulfonamide (17)

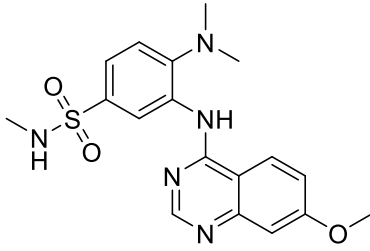

RT: 0.00 - 11.26

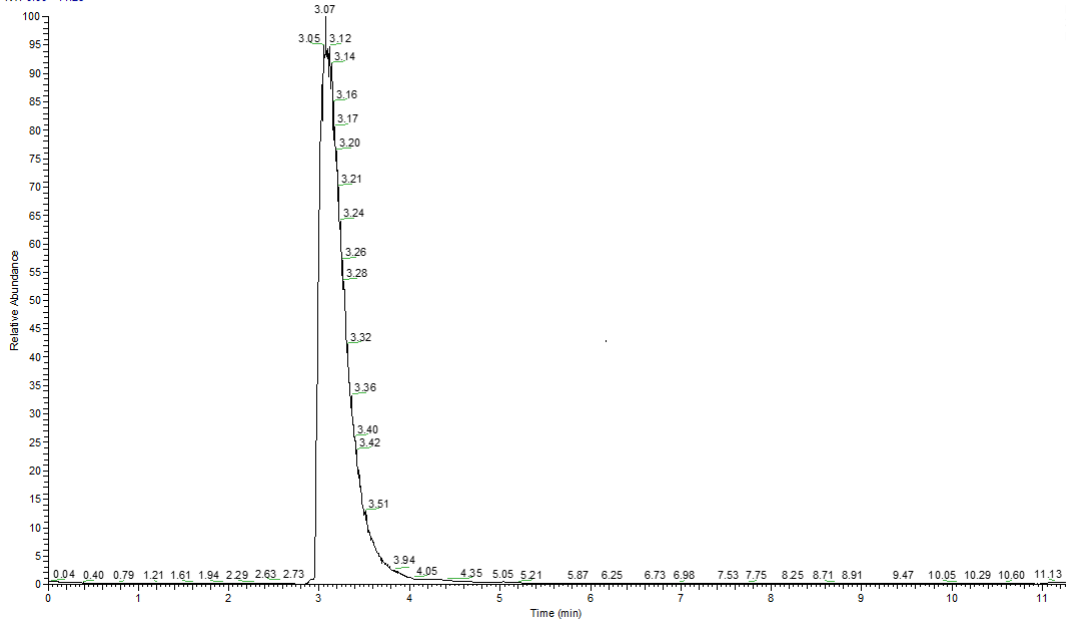

CA479 #595-826 RT: 3.01-3.16 AV: 32 NL: 2.45E10  
T: FTMS + pESI Full ms [150,000-2000,0000]

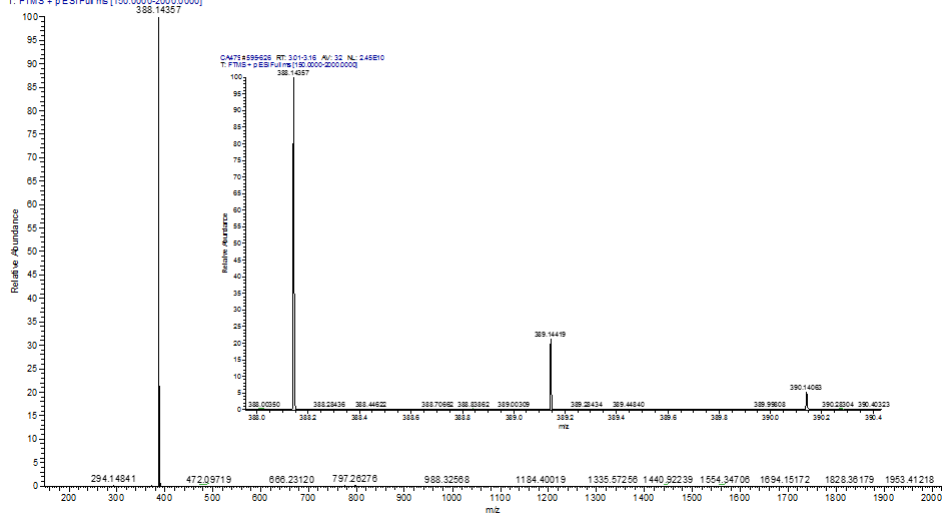

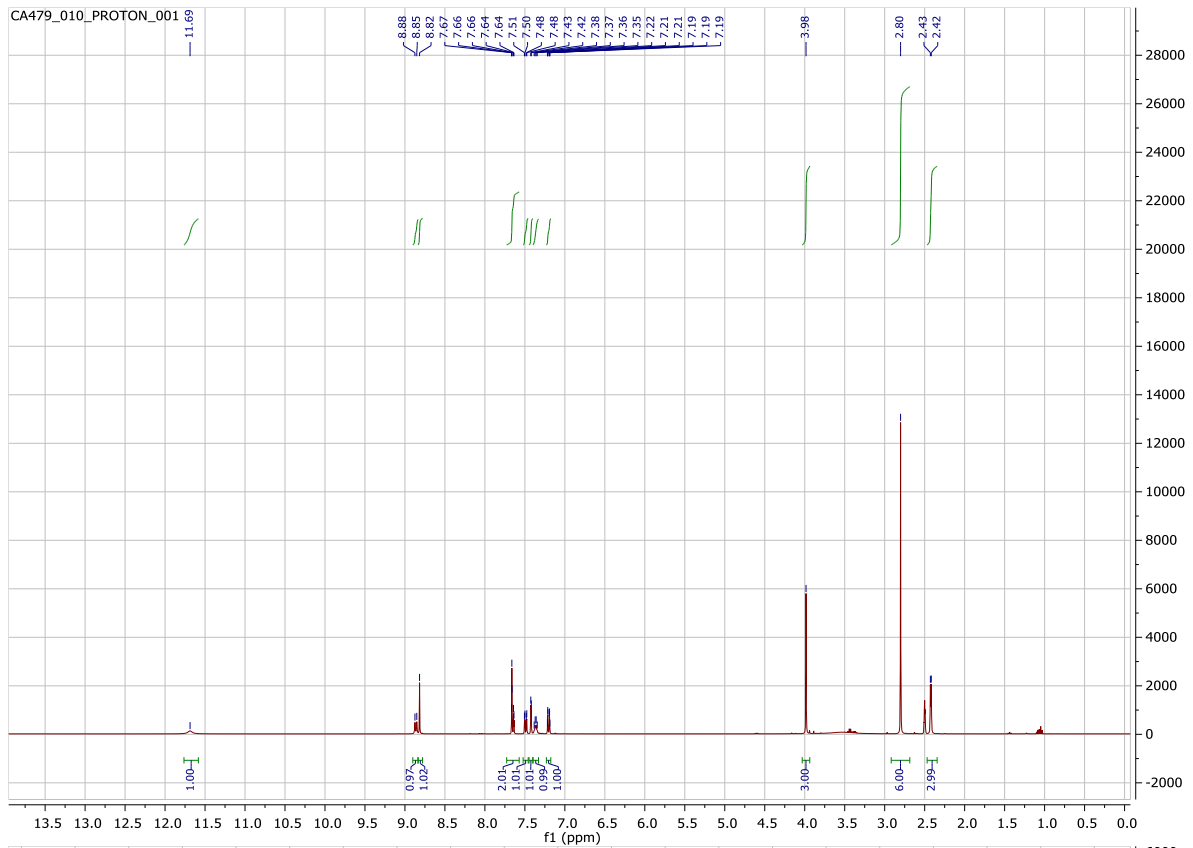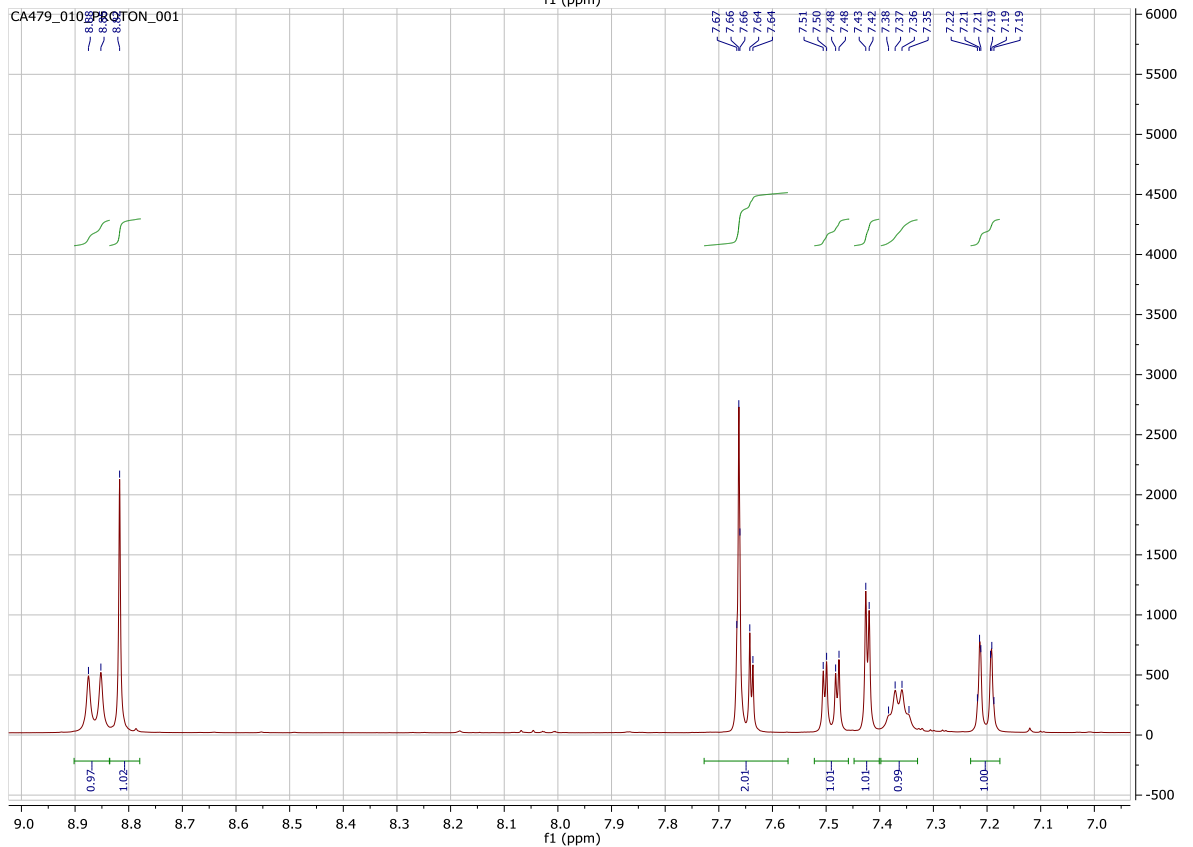



CA479\_010\_CARBON\_001

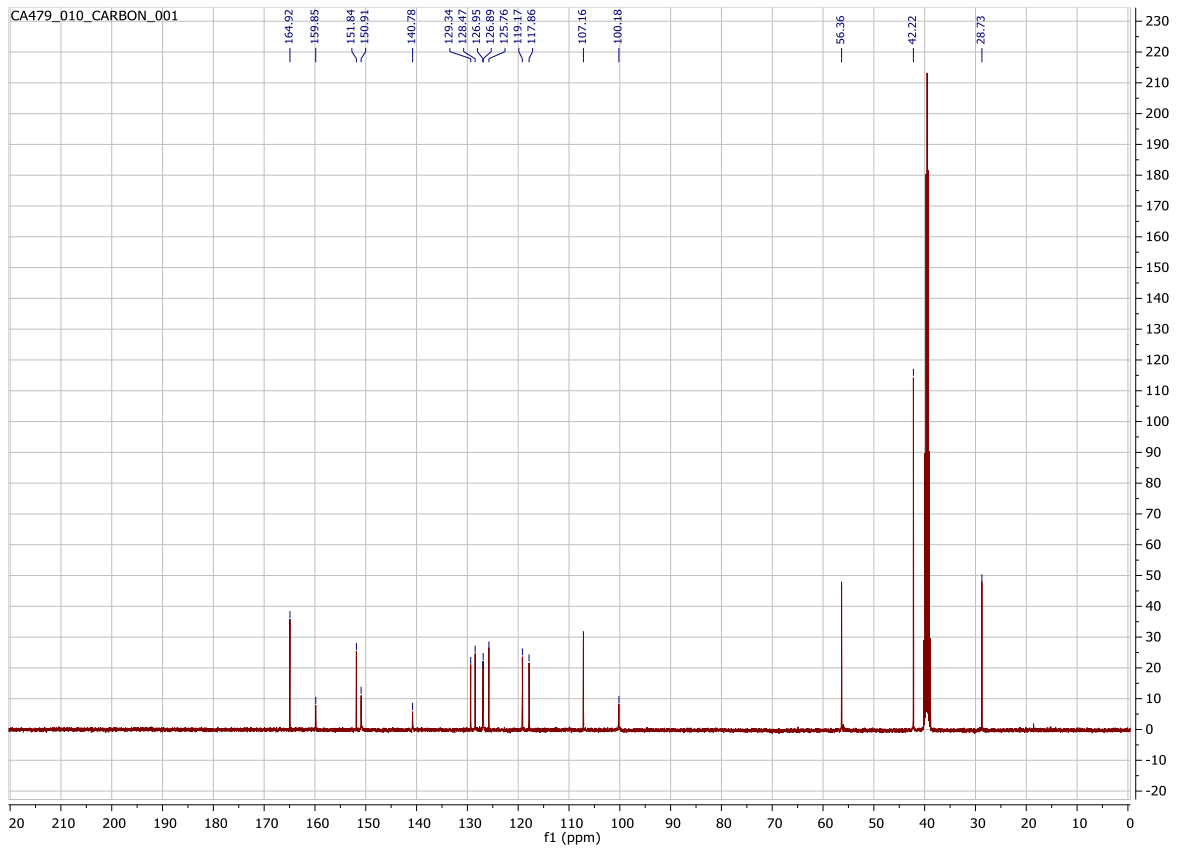

3-((6,7-dimethoxyquinazolin-4-yl)amino)-N-methylbenzenesulfonamide (2)

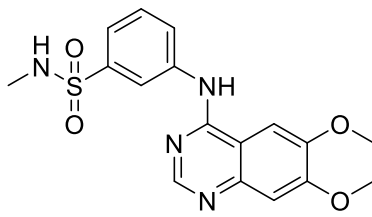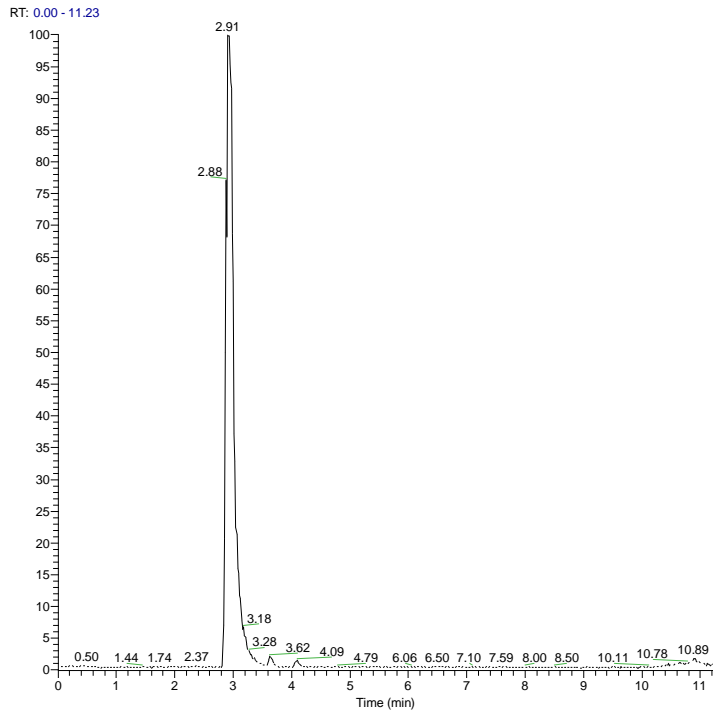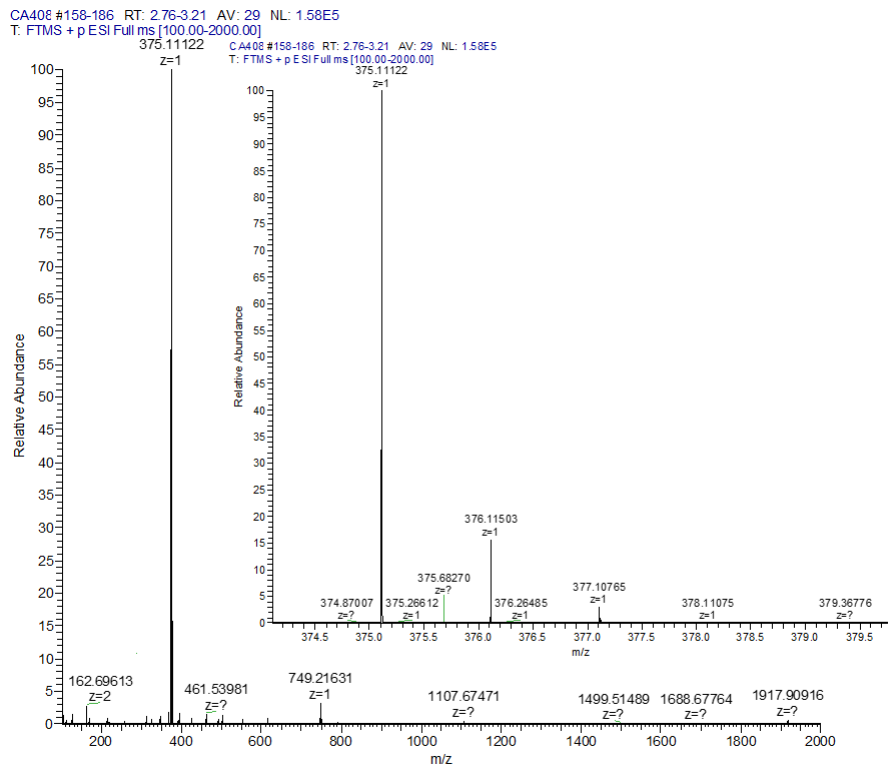

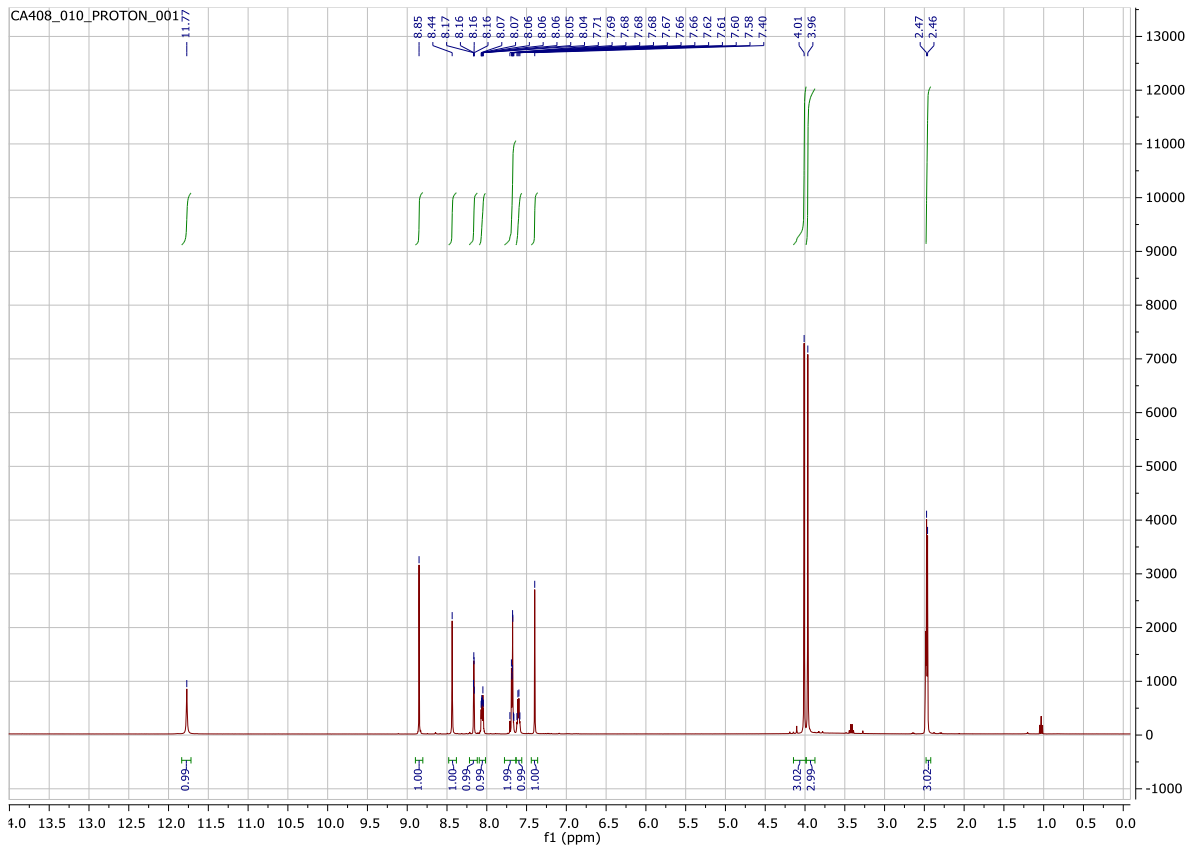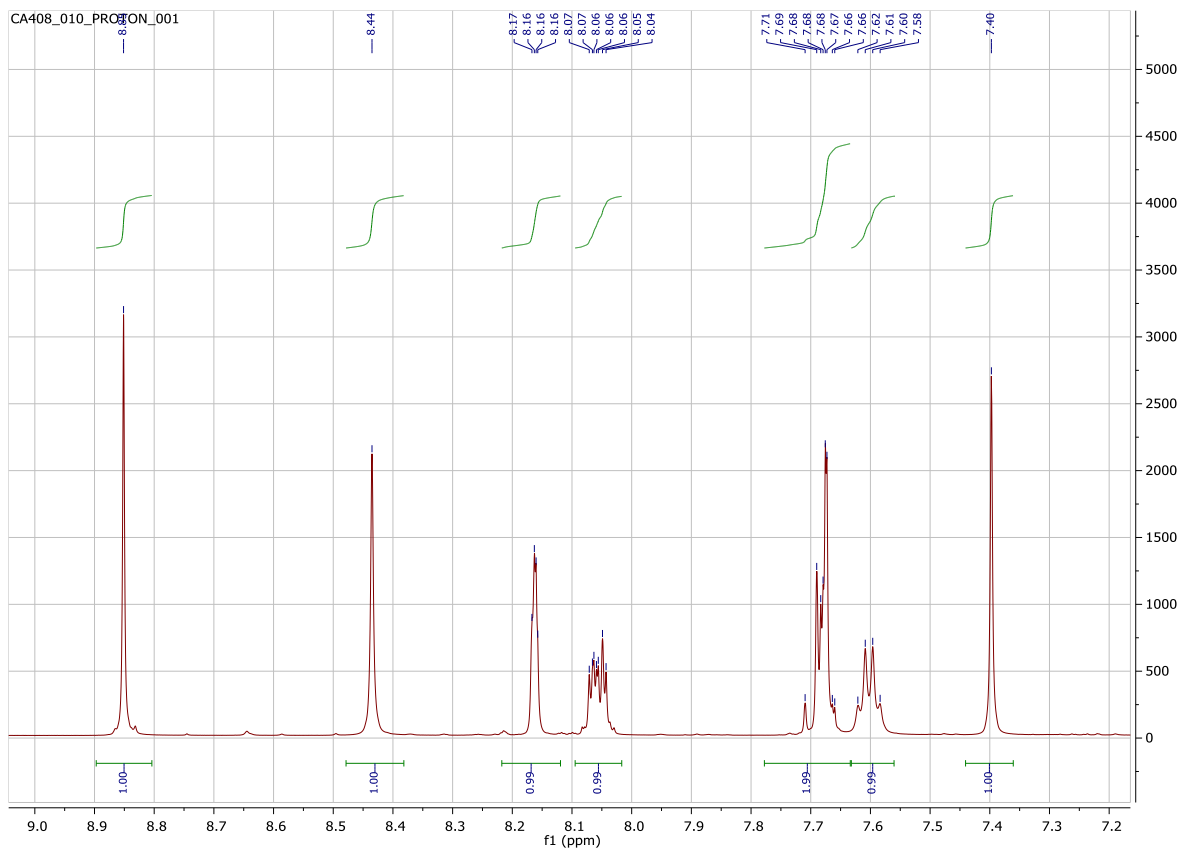

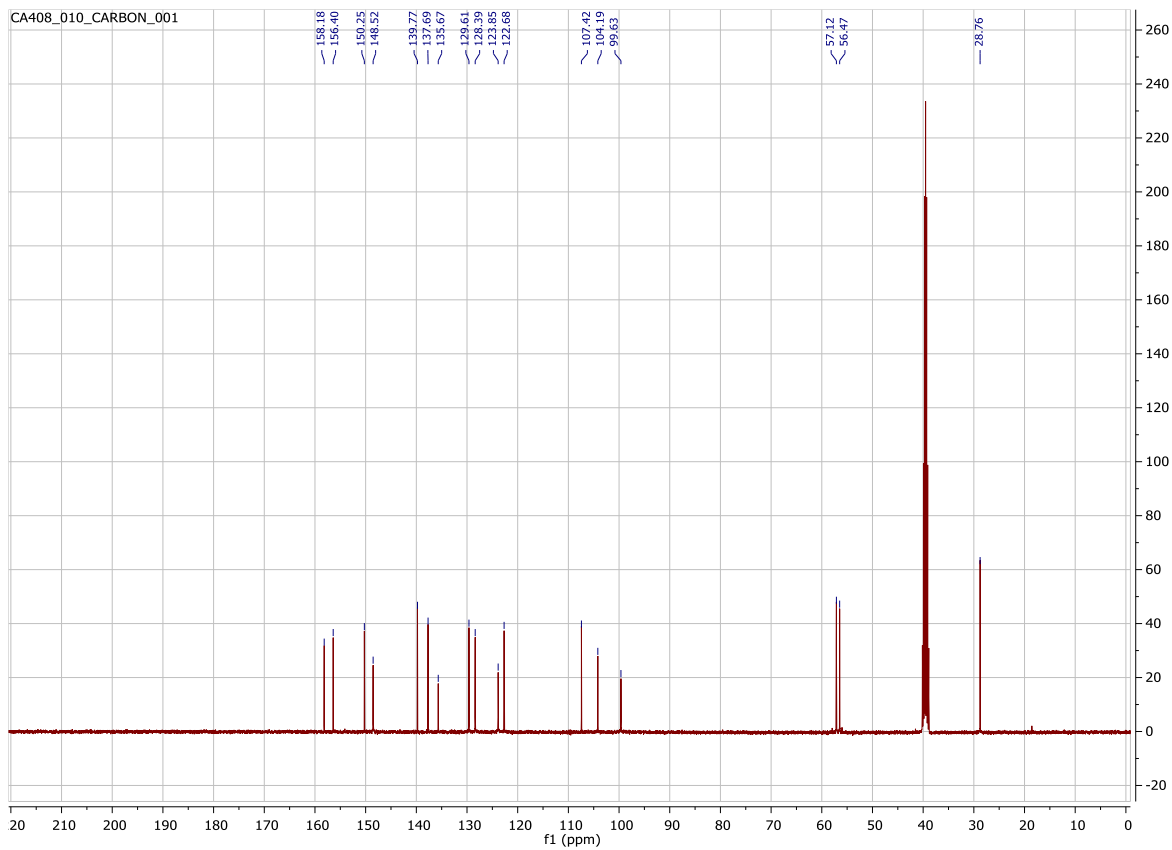

# $N^1$ -(6,7-dimethoxyquinazolin-4-yl)- $N^2,N^2$ -dimethylbenzene-1,2-diamine (**20**)

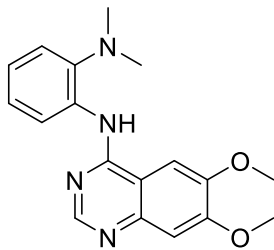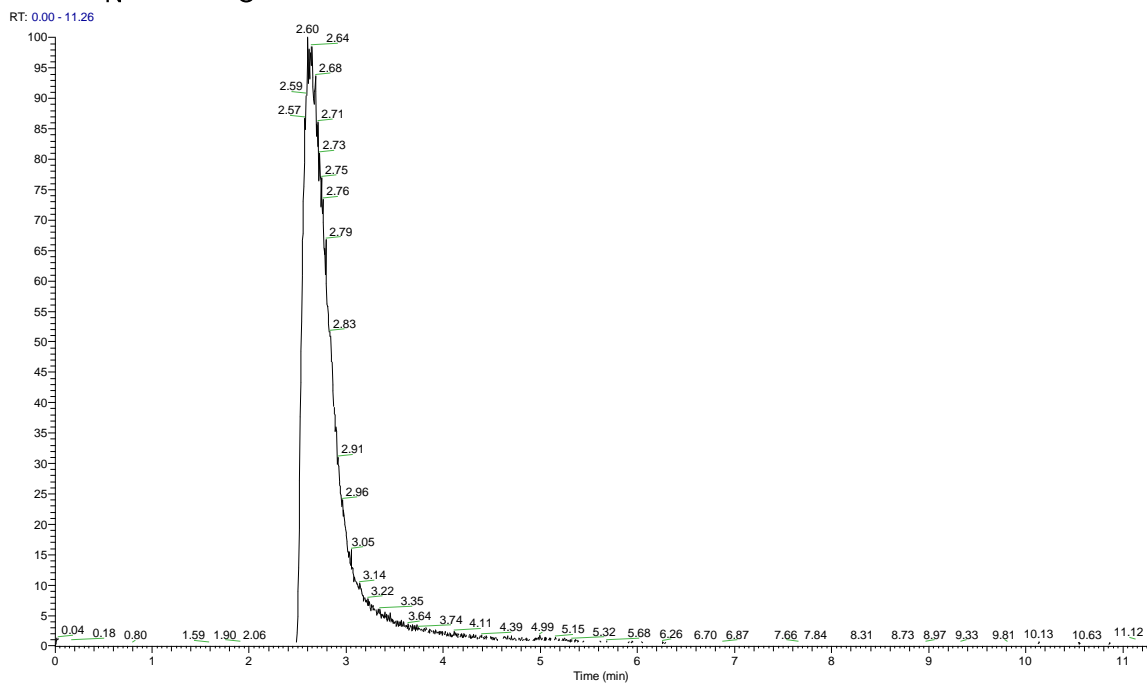

NL:  
1.17E10  
Base Peak  
MS CA481

CA481 #515-557 RT: 2.61-2.82 AV: 43 NL: 9.01E9  
T: FTMS +p ESI Fullms [150.0000-2000.0000]

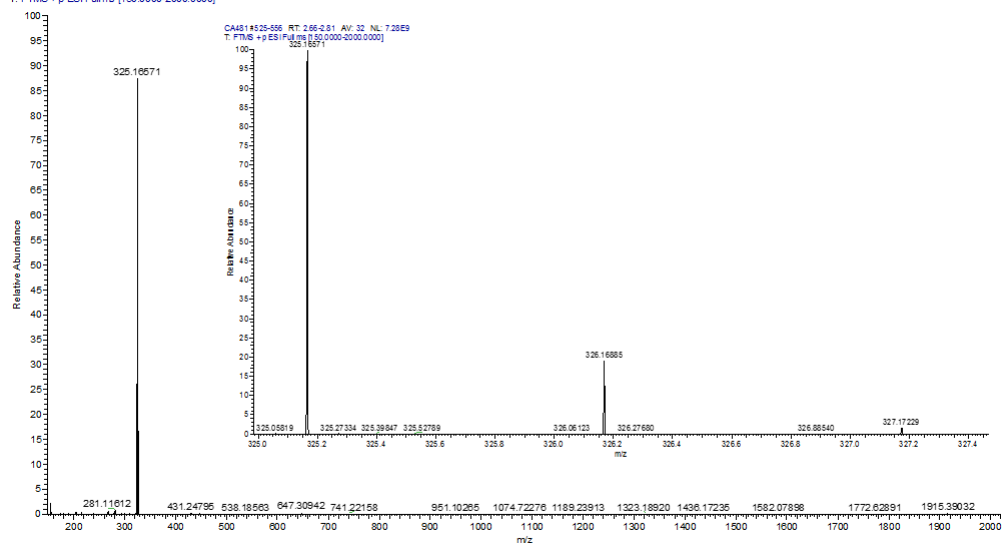

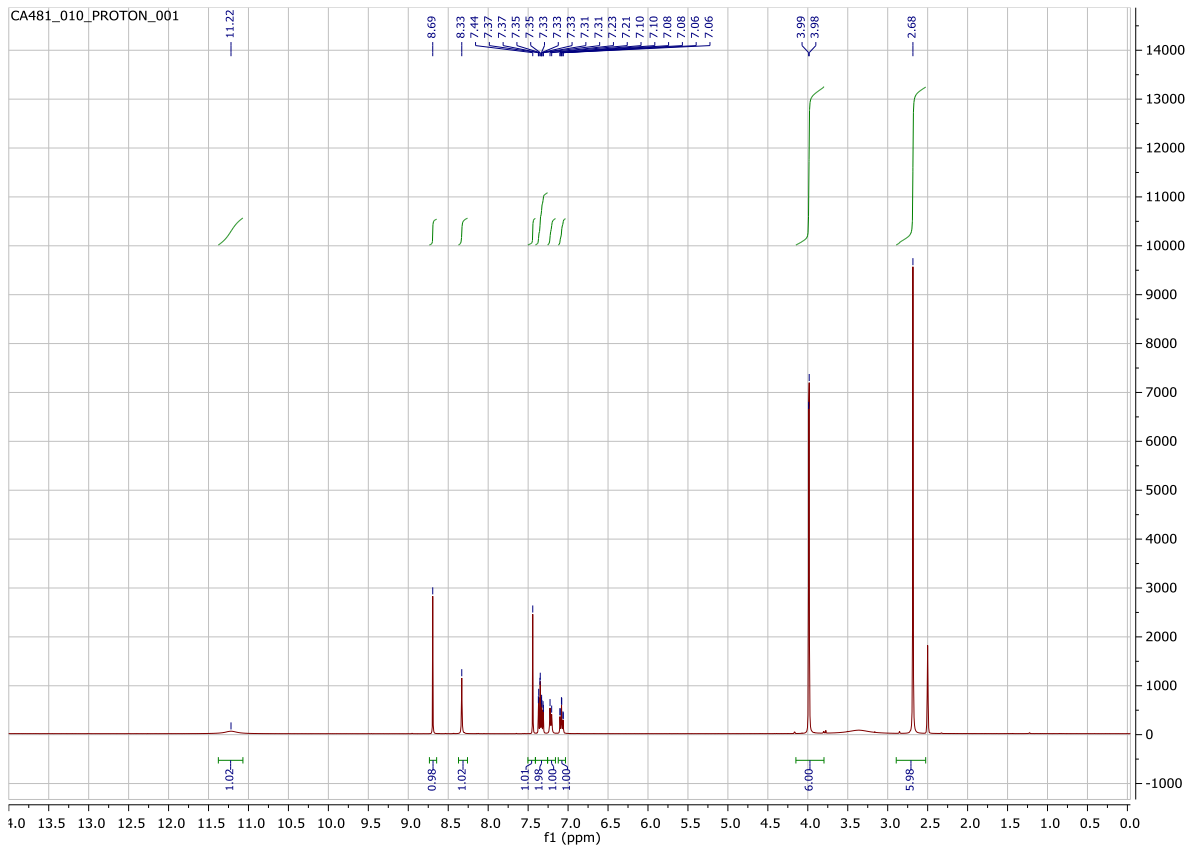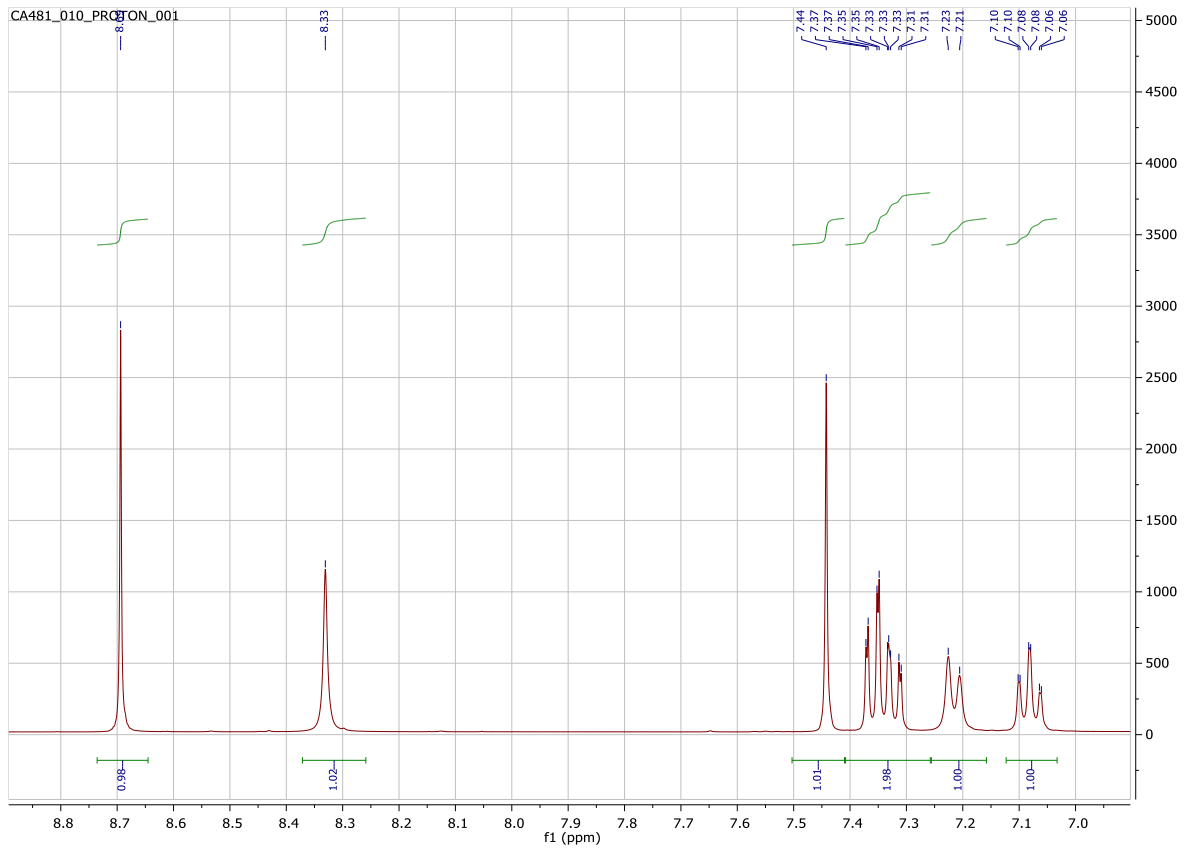

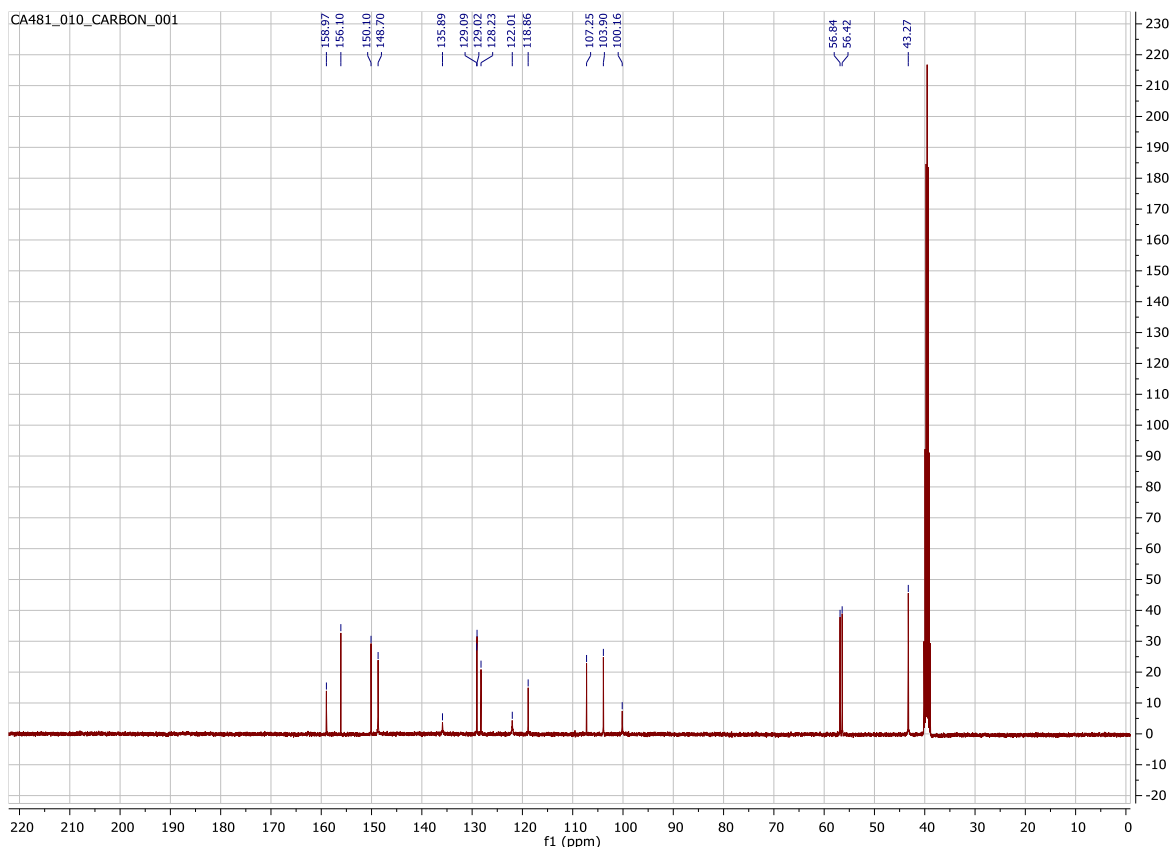

## 2. LabBook Codes and SMILES for 2, 7, 15-17, 20

**Table S1.** Lab book numbers and Smiles

| Number | Name  | Smiles                                                                        |
|--------|-------|-------------------------------------------------------------------------------|
| 2      | CA408 | <chem>CNS(C1=CC(NC2=C3C(C=C(OC)C(OC)=C3)=NC=N2)=CC=C1)(=O)=O</chem>           |
| 7      | CA471 | <chem>CN(C1=C(NC2=C3C(C=C(C(OC)=C3)OC)=NC=N2)C=C(S(NC)(=O)=O)C=C1)C</chem>    |
| 15     | CA472 | <chem>CN(C1=C(NC2=C3C(C=C(OC)C(OC)=C3)=NC(C)=N2)C=C(S(NC)(=O)=O)C=C1)C</chem> |
| 16     | CA475 | <chem>CN(C1=C(NC2=C3C(C=CC(OC)=C3)=NC=C2)C=C(S(NC)(=O)=O)C=C1)C</chem>        |
| 17     | CA479 | <chem>CN(C)C(C=CC(S(NC)(=O)=O)=C1)=C1NC2=C3C(C=C(OC)C=C3)=NC=N2</chem>        |
| 20     | CA481 | <chem>CN(C1=C(NC2=C3C(C=C(OC)C(OC)=C3)=NC=N2)C=CC=C1)C</chem>                 |

## 3. KINOMEScan® results of 7

**Table S2.** KINOMEScan® results of GSK114 (7)

| DiscoverX             | Entrez | 7 at 1 μM    |
|-----------------------|--------|--------------|
| Gene Symbol           |        | % inhibition |
| KIT(D816H)            | KIT    | 100          |
| MEK5                  | MAP2K5 | 100          |
| PFCDPK1(P.falciparum) | CDPK1  | 96.3         |
| STK36                 | STK36  | 94           |

|                               |          |      |
|-------------------------------|----------|------|
| ZAK                           | ZAK      | 93.1 |
| GAK                           | GAK      | 92.1 |
| FLT3(D835V)                   | FLT3     | 91.8 |
| KIT(D816V)                    | KIT      | 91.7 |
| PDGFRB                        | PDGFRB   | 91.4 |
| BRAF                          | BRAF     | 84   |
| BRAF(V600E)                   | BRAF     | 83   |
| ABL1(Q252H)-phosphorylated    | ABL1     | 79   |
| PIK3C2B                       | PIK3C2B  | 77   |
| ABL1(H396P)-nonphosphorylated | ABL1     | 73   |
| YSK4                          | MAP3K19  | 72   |
| PDGFRA                        | PDGFRA   | 69   |
| SIK2                          | SIK2     | 69   |
| IKK-alpha                     | CHUK     | 68   |
| IKK-beta                      | IKKBK    | 68   |
| IRAK1                         | IRAK1    | 68   |
| GRK2                          | ADRBK1   | 65   |
| LCK                           | LCK      | 63   |
| TNNI3K                        | TNNI3K   | 62   |
| WNK1                          | WNK1     | 62   |
| KIT(A829P)                    | KIT      | 61   |
| PIK3CD                        | PIK3CD   | 61   |
| IRAK4                         | IRAK4    | 56   |
| PIK3CA(I800L)                 | PIK3CA   | 56   |
| BTK                           | BTK      | 54   |
| PAK3                          | PAK3     | 54   |
| ZAP70                         | ZAP70    | 53   |
| QSK                           | KIAA0999 | 52   |
| PIK3CA                        | PIK3CA   | 51   |
| TAK1                          | MAP3K7   | 51   |
| ABL1(Q252H)-nonphosphorylated | ABL1     | 50   |
| ADCK3                         | CABC1    | 50   |
| KIT(L576P)                    | KIT      | 49   |
| RIPK5                         | DSTYK    | 49   |
| CAMK1B                        | PNCK     | 46   |
| PIK3CG                        | PIK3CG   | 45   |
| LOK                           | STK10    | 44   |
| LTK                           | LTK      | 44   |
| MKK7                          | MAP2K7   | 42   |
| DDR2                          | DDR2     | 41   |
| MAP4K2                        | MAP4K2   | 41   |
| SRMS                          | SRMS     | 41   |
| ABL1(F317I)-phosphorylated    | ABL1     | 40   |
| CSF1R-autoinhibited           | CSF1R    | 39   |
| ABL1(Y253F)-phosphorylated    | ABL1     | 38   |
| GRK3                          | ADRBK2   | 38   |



|                               |          |    |
|-------------------------------|----------|----|
| CDK4-cyclinD3                 | CDK4     | 37 |
| MEK4                          | MAP2K4   | 37 |
| TNK1                          | TNK1     | 37 |
| PIK3CA(Q546K)                 | PIK3CA   | 36 |
| MEK1                          | MAP2K1   | 35 |
| ABL1(E255K)-phosphorylated    | ABL1     | 34 |
| ABL1(H396P)-phosphorylated    | ABL1     | 34 |
| BMPR1B                        | BMPR1B   | 34 |
| FLT3(ITD,D835V)               | FLT3     | 34 |
| RSK4(Kin.Dom.1-N-terminal)    | RPS6KA6  | 34 |
| ABL1(T315I)-nonphosphorylated | ABL1     | 33 |
| MET(Y1235D)                   | MET      | 33 |
| PIP5K1C                       | PIP5K1C  | 33 |
| RSK2(Kin.Dom.2-C-terminal)    | RPS6KA3  | 33 |
| ERBB3                         | ERBB3    | 31 |
| FLT3(R834Q)                   | FLT3     | 31 |
| NIM1                          | MGC42105 | 31 |
| ASK2                          | MAP3K6   | 30 |
| MAP3K3                        | MAP3K3   | 30 |
| ABL1(F317L)-nonphosphorylated | ABL1     | 29 |
| BLK                           | BLK      | 29 |
| EGFR(S752-I759del)            | EGFR     | 29 |
| PIK3CA(M1043I)                | PIK3CA   | 29 |
| SBK1                          | SBK1     | 29 |
| TAOK3                         | TAOK3    | 29 |
| ULK3                          | ULK3     | 29 |
| VRK2                          | VRK2     | 29 |
| KIT(V559D)                    | KIT      | 28 |
| PRKCQ                         | PRKCQ    | 28 |
| RIPK2                         | RIPK2    | 28 |
| BRSK2                         | BRSK2    | 27 |
| MAPKAPK5                      | MAPKAPK5 | 27 |
| ABL1-phosphorylated           | ABL1     | 26 |
| TNK2                          | TNK2     | 26 |
| VEGFR2                        | KDR      | 26 |
| EGFR(E746-A750del)            | EGFR     | 25 |
| EGFR(T790M)                   | EGFR     | 25 |
| MEK2                          | MAP2K2   | 25 |
| NEK5                          | NEK5     | 25 |
| TAOK1                         | TAOK1    | 25 |
| TRPM6                         | TRPM6    | 25 |
| NLK                           | NLK      | 24 |
| PRKCD                         | PRKCD    | 24 |
| PRP4                          | PRPF4B   | 24 |
| RSK4(Kin.Dom.2-C-terminal)    | RPS6KA6  | 24 |
| GRK7                          | GRK7     | 23 |
| LRRK2(G2019S)                 | LRRK2    | 23 |

|                              |         |    |
|------------------------------|---------|----|
| LZK                          | MAP3K13 | 23 |
| PKNB(M.tuberculosis)         | pknB    | 23 |
| RAF1                         | RAF1    | 23 |
| S6K1                         | RPS6KB1 | 23 |
| CSF1R                        | CSF1R   | 22 |
| FLT3(ITD,F691L)              | FLT3    | 22 |
| KIT-autoinhibited            | KIT     | 22 |
| OSR1                         | OXR1    | 22 |
| TRKA                         | NTRK1   | 22 |
| ABL1-nonphosphorylated       | ABL1    | 21 |
| DLK                          | MAP3K12 | 21 |
| MST1                         | STK4    | 21 |
| MST4                         | MST4    | 21 |
| CDK4-cyclinD1                | CDK4    | 20 |
| FGFR1                        | FGFR1   | 20 |
| FLT3(D835H)                  | FLT3    | 20 |
| JAK1(JH2domain-pseudokinase) | JAK1    | 20 |
| PIK3C2G                      | PIK3C2G | 20 |
| PRKD1                        | PRKD1   | 20 |
| TAOK2                        | TAOK2   | 20 |
| ANKK1                        | ANKK1   | 19 |
| ULK2                         | ULK2    | 19 |
| CLK3                         | CLK3    | 18 |
| IKK-epsilon                  | IKBKE   | 18 |
| MINK                         | MINK1   | 18 |
| ULK1                         | ULK1    | 18 |
| VPS34                        | PIK3C3  | 18 |
| INSR                         | INSR    | 17 |
| JAK3(JH1domain-catalytic)    | JAK3    | 17 |
| MELK                         | MELK    | 17 |
| PIK3CA(E542K)                | PIK3CA  | 17 |
| PIK3CA(H1047Y)               | PIK3CA  | 17 |
| SIK                          | SIK1    | 17 |
| YANK1                        | STK32A  | 17 |
| AURKA                        | AURKA   | 16 |
| DCAMKL3                      | DCLK3   | 15 |
| EPHB6                        | EPHB6   | 15 |
| MLK2                         | MAP3K10 | 15 |
| SRPK2                        | SRPK2   | 15 |
| PIK4CB                       | PI4KB   | 14 |
| PRKG2                        | PRKG2   | 14 |
| SNRK                         | SNRK    | 14 |
| TRKB                         | NTRK2   | 14 |
| CLK4                         | CLK4    | 13 |
| CSNK2A2                      | CSNK2A2 | 13 |
| ERK8                         | MAPK15  | 13 |
| FLT3(D835Y)                  | FLT3    | 13 |

|                               |         |    |
|-------------------------------|---------|----|
| HIPK4                         | HIPK4   | 13 |
| INSRR                         | INSRR   | 13 |
| KIT                           | KIT     | 13 |
| MKNK2                         | MKNK2   | 13 |
| PCTK1                         | CDK16   | 13 |
| PLK2                          | PLK2    | 13 |
| PRKCH                         | PRKCH   | 13 |
| RSK2(Kin.Dom.1-N-terminal)    | RPS6KA3 | 13 |
| AMPK-alpha2                   | PRKAA2  | 12 |
| AXL                           | AXL     | 12 |
| DCAMKL1                       | DCLK1   | 12 |
| FLT3-autoinhibited            | FLT3    | 12 |
| MAP3K2                        | MAP3K2  | 12 |
| NEK4                          | NEK4    | 12 |
| CAMK2B                        | CAMK2B  | 11 |
| CHEK2                         | CHEK2   | 11 |
| CSNK1G3                       | CSNK1G3 | 11 |
| HCK                           | HCK     | 11 |
| PKN2                          | PKN2    | 11 |
| RET                           | RET     | 11 |
| ALK                           | ALK     | 10 |
| MAST1                         | MAST1   | 10 |
| MKNK1                         | MKNK1   | 10 |
| MLK1                          | MAP3K9  | 10 |
| CAMK2A                        | CAMK2A  | 9  |
| CDKL5                         | CDKL5   | 9  |
| DAPK3                         | DAPK3   | 9  |
| JAK2(JH1domain-catalytic)     | JAK2    | 9  |
| LRRK2                         | LRRK2   | 9  |
| MYLK                          | MYLK    | 9  |
| NDR2                          | STK38L  | 9  |
| RPS6KA4(Kin.Dom.2-C-terminal) | RPS6KA4 | 9  |
| BUB1                          | BUB1    | 8  |
| CLK1                          | CLK1    | 8  |
| EGFR(L858R)                   | EGFR    | 8  |
| FAK                           | PTK2    | 8  |
| JNK1                          | MAPK8   | 8  |
| KIT(V559D,T670I)              | KIT     | 8  |
| PRKD2                         | PRKD2   | 8  |
| STK39                         | STK39   | 8  |
| CLK2                          | CLK2    | 7  |
| EGFR(L858R,T790M)             | EGFR    | 7  |
| FLT3                          | FLT3    | 7  |
| FLT3(K663Q)                   | FLT3    | 7  |
| GCN2(Kin.Dom.2,S808G)         | EIF2AK4 | 7  |
| ICK                           | ICK     | 7  |
| MARK1                         | MARK1   | 7  |

|                               |             |   |
|-------------------------------|-------------|---|
| PAK6                          | PAK6        | 7 |
| PIKFYVE                       | PIKFYVE     | 7 |
| PLK4                          | PLK4        | 7 |
| PRKD3                         | PRKD3       | 7 |
| RPS6KA5(Kin.Dom.1-N-terminal) | RPS6KA5     | 7 |
| TNIK                          | TNIK        | 7 |
| TTK                           | TTK         | 7 |
| ABL1(M351T)-phosphorylated    | ABL1        | 6 |
| ACVR2B                        | ACVR2B      | 6 |
| CDK7                          | CDK7        | 6 |
| ERK5                          | MAPK7       | 6 |
| PFPK5(P.falci-parum)          | MAL13P1.279 | 6 |
| PKAC-alpha                    | PRKACA      | 6 |
| STK33                         | STK33       | 6 |
| ALK(L1196M)                   | ALK         | 5 |
| CAMKK1                        | CAMKK1      | 5 |
| EPHA3                         | EPHA3       | 5 |
| HIPK1                         | HIPK1       | 5 |
| PIK3CA(C420R)                 | PIK3CA      | 5 |
| PIK3CA(E545K)                 | PIK3CA      | 5 |
| PRKCI                         | PRKCI       | 5 |
| YSK1                          | STK25       | 5 |
| MAP3K15                       | MAP3K15     | 4 |
| MEK3                          | MAP2K3      | 4 |
| RPS6KA4(Kin.Dom.1-N-terminal) | RPS6KA4     | 4 |
| HASPIN                        | GSG2        | 3 |
| MET                           | MET         | 3 |
| MST1R                         | MST1R       | 3 |
| MARK4                         | MARK4       | 2 |
| NEK2                          | NEK2        | 2 |
| PIK3CB                        | PIK3CB      | 2 |
| RSK1(Kin.Dom.1-N-terminal)    | RPS6KA1     | 2 |
| WNK3                          | WNK3        | 2 |
| ABL1(F317I)-nonphosphorylated | ABL1        | 1 |
| CDK3                          | CDK3        | 1 |
| CTK                           | MATK        | 1 |
| ROCK1                         | ROCK1       | 1 |
| SGK                           | SGK1        | 1 |
| SGK3                          | SGK3        | 1 |
| AAK1                          | AAK1        | 0 |
| ABL1(F317L)-phosphorylated    | ABL1        | 0 |
| ABL1(T315I)-phosphorylated    | ABL1        | 0 |
| ABL2                          | ABL2        | 0 |
| ACVR1                         | ACVR1       | 0 |
| ACVR1B                        | ACVR1B      | 0 |
| ACVR2A                        | ACVR2A      | 0 |
| ACVRL1                        | ACVRL1      | 0 |

|             |          |   |
|-------------|----------|---|
| ADCK4       | ADCK4    | 0 |
| AKT1        | AKT1     | 0 |
| AKT2        | AKT2     | 0 |
| AKT3        | AKT3     | 0 |
| ALK(C1156Y) | ALK      | 0 |
| AMPK-alpha1 | PRKAA1   | 0 |
| ARK5        | NUAK1    | 0 |
| ASK1        | MAP3K5   | 0 |
| AURKB       | AURKB    | 0 |
| AURKC       | AURKC    | 0 |
| BIKE        | BMP2K    | 0 |
| BMPR1A      | BMPR1A   | 0 |
| BMPR2       | BMPR2    | 0 |
| BMX         | BMX      | 0 |
| BRK         | PTK6     | 0 |
| BRSK1       | BRSK1    | 0 |
| CAMK1       | CAMK1    | 0 |
| CAMK1D      | CAMK1D   | 0 |
| CAMK1G      | CAMK1G   | 0 |
| CAMK2D      | CAMK2D   | 0 |
| CAMK2G      | CAMK2G   | 0 |
| CAMK4       | CAMK4    | 0 |
| CAMKK2      | CAMKK2   | 0 |
| CASK        | CASK     | 0 |
| CDC2L1      | CDK11B   | 0 |
| CDC2L2      | CDC2L2   | 0 |
| CDC2L5      | CDK13    | 0 |
| CDK11       | CDK19    | 0 |
| CDK2        | CDK2     | 0 |
| CDK4        | CDK4     | 0 |
| CDK5        | CDK5     | 0 |
| CDK8        | CDK8     | 0 |
| CDK9        | CDK9     | 0 |
| CDKL1       | CDKL1    | 0 |
| CDKL2       | CDKL2    | 0 |
| CDKL3       | CDKL3    | 0 |
| CHEK1       | CHEK1    | 0 |
| CIT         | CIT      | 0 |
| CSK         | CSK      | 0 |
| CSNK1A1     | CSNK1A1  | 0 |
| CSNK1A1L    | CSNK1A1L | 0 |
| CSNK1D      | CSNK1D   | 0 |
| CSNK1E      | CSNK1E   | 0 |
| CSNK1G1     | CSNK1G1  | 0 |
| CSNK1G2     | CSNK1G2  | 0 |
| CSNK2A1     | CSNK2A1  | 0 |
| DAPK1       | DAPK1    | 0 |

|                           |          |   |
|---------------------------|----------|---|
| DAPK2                     | DAPK2    | 0 |
| DCAMKL2                   | DCLK2    | 0 |
| DDR1                      | DDR1     | 0 |
| DMPK                      | DMPK     | 0 |
| DMPK2                     | CDC42BPG | 0 |
| DRAK1                     | STK17A   | 0 |
| DRAK2                     | STK17B   | 0 |
| DYRK1A                    | DYRK1A   | 0 |
| DYRK1B                    | DYRK1B   | 0 |
| DYRK2                     | DYRK2    | 0 |
| EGFR                      | EGFR     | 0 |
| EGFR(G719C)               | EGFR     | 0 |
| EGFR(G719S)               | EGFR     | 0 |
| EGFR(L747-E749del, A750P) | EGFR     | 0 |
| EGFR(L747-S752del, P753S) | EGFR     | 0 |
| EGFR(L747-T751del,Sins)   | EGFR     | 0 |
| EGFR(L861Q)               | EGFR     | 0 |
| EIF2AK1                   | EIF2AK1  | 0 |
| EPHA1                     | EPHA1    | 0 |
| EPHA2                     | EPHA2    | 0 |
| EPHA4                     | EPHA4    | 0 |
| EPHA5                     | EPHA5    | 0 |
| EPHA6                     | EPHA6    | 0 |
| EPHA7                     | EPHA7    | 0 |
| EPHA8                     | EPHA8    | 0 |
| EPHB1                     | EPHB1    | 0 |
| EPHB2                     | EPHB2    | 0 |
| EPHB3                     | EPHB3    | 0 |
| EPHB4                     | EPHB4    | 0 |
| ERBB2                     | ERBB2    | 0 |
| ERBB4                     | ERBB4    | 0 |
| ERK1                      | MAPK3    | 0 |
| ERK2                      | MAPK1    | 0 |
| ERK3                      | MAPK6    | 0 |
| ERK4                      | MAPK4    | 0 |
| ERN1                      | ERN1     | 0 |
| FER                       | FER      | 0 |
| FES                       | FES      | 0 |
| FGFR2                     | FGFR2    | 0 |
| FGFR3                     | FGFR3    | 0 |
| FGFR3(G697C)              | FGFR3    | 0 |
| FGFR4                     | FGFR4    | 0 |
| FGR                       | FGR      | 0 |
| FLT1                      | FLT1     | 0 |
| FLT3(ITD)                 | FLT3     | 0 |
| FLT3(N841I)               | FLT3     | 0 |
| FLT4                      | FLT4     | 0 |

|                           |          |   |
|---------------------------|----------|---|
| FRK                       | FRK      | 0 |
| FYN                       | FYN      | 0 |
| GRK1                      | GRK1     | 0 |
| GRK4                      | GRK4     | 0 |
| GSK3A                     | GSK3A    | 0 |
| GSK3B                     | GSK3B    | 0 |
| HIPK2                     | HIPK2    | 0 |
| HIPK3                     | HIPK3    | 0 |
| HPK1                      | MAP4K1   | 0 |
| HUNK                      | HUNK     | 0 |
| IGF1R                     | IGF1R    | 0 |
| IRAK3                     | IRAK3    | 0 |
| ITK                       | ITK      | 0 |
| JAK1(JH1domain-catalytic) | JAK1     | 0 |
| JNK2                      | MAPK9    | 0 |
| JNK3                      | MAPK10   | 0 |
| KIT(V559D,V654A)          | KIT      | 0 |
| LATS1                     | LATS1    | 0 |
| LATS2                     | LATS2    | 0 |
| LIMK1                     | LIMK1    | 0 |
| LIMK2                     | LIMK2    | 0 |
| LKB1                      | STK11    | 0 |
| LYN                       | LYN      | 0 |
| MAK                       | MAK      | 0 |
| MAP3K1                    | MAP3K1   | 0 |
| MAP3K4                    | MAP3K4   | 0 |
| MAP4K3                    | MAP4K3   | 0 |
| MAP4K4                    | MAP4K4   | 0 |
| MAP4K5                    | MAP4K5   | 0 |
| MAPKAPK2                  | MAPKAPK2 | 0 |
| MARK2                     | MARK2    | 0 |
| MARK3                     | MARK3    | 0 |
| MEK6                      | MAP2K6   | 0 |
| MERTK                     | MERTK    | 0 |
| MET(M1250T)               | MET      | 0 |
| MLCK                      | MYLK3    | 0 |
| MLK3                      | MAP3K11  | 0 |
| MRCKA                     | CDC42BPA | 0 |
| MRCKB                     | CDC42BPB | 0 |
| MST2                      | STK3     | 0 |
| MST3                      | STK24    | 0 |
| MTOR                      | MTOR     | 0 |
| MUSK                      | MUSK     | 0 |
| MYLK2                     | MYLK2    | 0 |
| MYLK4                     | MYLK4    | 0 |
| MYO3A                     | MYO3A    | 0 |
| MYO3B                     | MYO3B    | 0 |

|                |         |   |
|----------------|---------|---|
| NDR1           | STK38   | 0 |
| NEK1           | NEK1    | 0 |
| NEK10          | NEK10   | 0 |
| NEK11          | NEK11   | 0 |
| NEK3           | NEK3    | 0 |
| NEK6           | NEK6    | 0 |
| NEK7           | NEK7    | 0 |
| NEK9           | NEK9    | 0 |
| NIK            | MAP3K14 | 0 |
| p38-alpha      | MAPK14  | 0 |
| p38-beta       | MAPK11  | 0 |
| p38-delta      | MAPK13  | 0 |
| p38-gamma      | MAPK12  | 0 |
| PAK1           | PAK1    | 0 |
| PAK2           | PAK2    | 0 |
| PAK4           | PAK4    | 0 |
| PAK7           | PAK7    | 0 |
| PCK2           | CDK17   | 0 |
| PCK3           | CDK18   | 0 |
| PDPK1          | PDPK1   | 0 |
| PFTAIRE2       | CDK15   | 0 |
| PFTK1          | CDK14   | 0 |
| PHKG1          | PHKG1   | 0 |
| PHKG2          | PHKG2   | 0 |
| PIK3CA(E545A)  | PIK3CA  | 0 |
| PIK3CA(H1047L) | PIK3CA  | 0 |
| PIM1           | PIM1    | 0 |
| PIM2           | PIM2    | 0 |
| PIM3           | PIM3    | 0 |
| PIP5K1A        | PIP5K1A | 0 |
| PIP5K2B        | PIP4K2B | 0 |
| PIP5K2C        | PIP4K2C | 0 |
| PKAC-beta      | PRKACB  | 0 |
| PKMYT1         | PKMYT1  | 0 |
| PKN1           | PKN1    | 0 |
| PLK1           | PLK1    | 0 |
| PLK3           | PLK3    | 0 |
| PRKCE          | PRKCE   | 0 |
| PRKG1          | PRKG1   | 0 |
| PRKR           | EIF2AK2 | 0 |
| PRKX           | PRKX    | 0 |
| PYK2           | PTK2B   | 0 |
| RET(M918T)     | RET     | 0 |
| RET(V804L)     | RET     | 0 |
| RET(V804M)     | RET     | 0 |
| RIOK1          | RIOK1   | 0 |
| RIOK2          | RIOK2   | 0 |



|                               |         |   |
|-------------------------------|---------|---|
| RIOK3                         | RIOK3   | 0 |
| RIPK1                         | RIPK1   | 0 |
| RIPK4                         | RIPK4   | 0 |
| ROCK2                         | ROCK2   | 0 |
| ROS1                          | ROS1    | 0 |
| RPS6KA5(Kin.Dom.2-C-terminal) | RPS6KA5 | 0 |
| RSK1(Kin.Dom.2-C-terminal)    | RPS6KA1 | 0 |
| RSK3(Kin.Dom.1-N-terminal)    | RPS6KA2 | 0 |
| RSK3(Kin.Dom.2-C-terminal)    | RPS6KA2 | 0 |
| SgK110                        | SgK110  | 0 |
| SGK2                          | SGK2    | 0 |
| SLK                           | SLK     | 0 |
| SNARK                         | NUAK2   | 0 |
| SRC                           | SRC     | 0 |
| SRPK1                         | SRPK1   | 0 |
| SRPK3                         | SRPK3   | 0 |
| STK16                         | STK16   | 0 |
| STK35                         | STK35   | 0 |
| SYK                           | SYK     | 0 |
| TBK1                          | TBK1    | 0 |
| TEC                           | TEC     | 0 |
| TESK1                         | TESK1   | 0 |
| TGFBR1                        | TGFBR1  | 0 |
| TGFBR2                        | TGFBR2  | 0 |
| TIE1                          | TIE1    | 0 |
| TIE2                          | TEK     | 0 |
| TLK1                          | TLK1    | 0 |
| TLK2                          | TLK2    | 0 |
| TRKC                          | NTRK3   | 0 |
| TSSK1B                        | TSSK1B  | 0 |
| TSSK3                         | TSSK3   | 0 |
| TXK                           | TXK     | 0 |
| TYK2(JH1domain-catalytic)     | TYK2    | 0 |
| TYK2(JH2domain-pseudokinase)  | TYK2    | 0 |
| TYRO3                         | TYRO3   | 0 |
| WEE1                          | WEE1    | 0 |
| WEE2                          | WEE2    | 0 |
| WNK2                          | WNK2    | 0 |
| WNK4                          | WNK4    | 0 |
| YANK2                         | STK32B  | 0 |
| YANK3                         | STK32C  | 0 |
| YES                           | YES1    | 0 |

#### 4. KINOMEScan® results of 15

**Table S3.** KINOMEScan® results of 15

| DiscoverX                     | Entrez  | 15 at 1 $\mu$ M |
|-------------------------------|---------|-----------------|
| Gene Symbol                   |         | % inhibition    |
| MEK5                          | MAP2K5  | 90.3            |
| GAK                           | GAK     | 78              |
| PIK3C2B                       | PIK3C2B | 71              |
| CDK3                          | CDK3    | 56              |
| PRP4                          | PRPF4B  | 52              |
| MAP3K3                        | MAP3K3  | 44              |
| SBK1                          | SBK1    | 44              |
| KIT(A829P)                    | KIT     | 42              |
| OSR1                          | OXS1    | 42              |
| SGK                           | SGK1    | 39              |
| DDR2                          | DDR2    | 38              |
| MKNK2                         | MKNK2   | 38              |
| PIK3CA(I800L)                 | PIK3CA  | 38              |
| FLT3(D835V)                   | FLT3    | 37              |
| IKK-beta                      | IKBKB   | 37              |
| PIK3CA(Q546K)                 | PIK3CA  | 37              |
| PIK3CD                        | PIK3CD  | 37              |
| RIPK1                         | RIPK1   | 37              |
| TRKA                          | NTRK1   | 37              |
| CDK4-cyclinD1                 | CDK4    | 36              |
| TNK1                          | TNK1    | 35              |
| ABL1(Q252H)-phosphorylated    | ABL1    | 34              |
| ROCK1                         | ROCK1   | 34              |
| ABL1(F317L)-nonphosphorylated | ABL1    | 33              |
| ABL1(Q252H)-nonphosphorylated | ABL1    | 33              |
| IKK-alpha                     | CHUK    | 33              |
| CSF1R-autoinhibited           | CSF1R   | 32              |
| FLT3(R834Q)                   | FLT3    | 32              |
| GRK3                          | ADRBK2  | 32              |
| ABL1(H396P)-nonphosphorylated | ABL1    | 31              |
| BMPR1B                        | BMPR1B  | 31              |
| EGFR(E746-A750del)            | EGFR    | 31              |
| ULK1                          | ULK1    | 31              |
| MKK7                          | MAP2K7  | 30              |
| RSK4(Kin.Dom.1-N-terminal)    | RPS6KA6 | 30              |
| CAMK1B                        | PNCK    | 28              |
| HIPK3                         | HIPK3   | 28              |
| MAP3K15                       | MAP3K15 | 28              |
| TSSK3                         | TSSK3   | 28              |
| EPHA7                         | EPHA7   | 27              |

|                              |             |    |
|------------------------------|-------------|----|
| MAP3K1                       | MAP3K1      | 27 |
| NIM1                         | MGC42105    | 27 |
| PFCDPK1(P.falciparum)        | CDPK1       | 27 |
| BTK                          | BTK         | 26 |
| CASK                         | CASK        | 26 |
| FLT3(ITD,D835V)              | FLT3        | 26 |
| JAK1(JH2domain-pseudokinase) | JAK1        | 26 |
| EGFR(T790M)                  | EGFR        | 25 |
| MEK4                         | MAP2K4      | 25 |
| PIK3CB                       | PIK3CB      | 25 |
| PKNB(M.tuberculosis)         | pknB        | 25 |
| PRKCI                        | PRKCI       | 25 |
| VPS34                        | PIK3C3      | 25 |
| ANKK1                        | ANKK1       | 24 |
| BRAF(V600E)                  | BRAF        | 24 |
| PFPK5(P.falciparum)          | MAL13P1.279 | 24 |
| TAK1                         | MAP3K7      | 24 |
| CDC2L5                       | CDK13       | 23 |
| CDKL3                        | CDKL3       | 23 |
| MAPKAPK5                     | MAPKAPK5    | 23 |
| PLK2                         | PLK2        | 23 |
| PLK4                         | PLK4        | 23 |
| ULK3                         | ULK3        | 23 |
| ABL1(F317I)-phosphorylated   | ABL1        | 22 |
| INSRR                        | INSRR       | 22 |
| MEK3                         | MAP2K3      | 22 |
| MINK                         | MINK1       | 22 |
| PCTK1                        | CDK16       | 22 |
| PIK3C2G                      | PIK3C2G     | 22 |
| PIK3CA(E542K)                | PIK3CA      | 22 |
| PIP5K1A                      | PIP5K1A     | 22 |
| QSK                          | KIAA0999    | 22 |
| TRKB                         | NTRK2       | 22 |
| TRKC                         | NTRK3       | 22 |
| WNK1                         | WNK1        | 22 |
| BMPR2                        | BMPR2       | 21 |
| BRSK2                        | BRSK2       | 21 |
| CDK4                         | CDK4        | 21 |
| PIK3CA(E545K)                | PIK3CA      | 21 |
| PIK3CA(H1047L)               | PIK3CA      | 21 |
| PIK3CA(H1047Y)               | PIK3CA      | 21 |
| PRKG2                        | PRKG2       | 21 |
| BRAF                         | BRAF        | 20 |
| GRK1                         | GRK1        | 20 |
| S6K1                         | RPS6KB1     | 20 |
| CDKL5                        | CDKL5       | 19 |
| KIT-autoinhibited            | KIT         | 19 |

|                               |         |    |
|-------------------------------|---------|----|
| SGK3                          | SGK3    | 19 |
| ABL1(Y253F)-phosphorylated    | ABL1    | 18 |
| CDK7                          | CDK7    | 18 |
| CSNK2A1                       | CSNK2A1 | 18 |
| ERK3                          | MAPK6   | 18 |
| MAP3K2                        | MAP3K2  | 18 |
| MEK1                          | MAP2K1  | 18 |
| PIP5K1C                       | PIP5K1C | 18 |
| PIP5K2C                       | PIP4K2C | 18 |
| SNARK                         | NUAK2   | 18 |
| ABL1(F317I)-nonphosphorylated | ABL1    | 17 |
| DYRK1B                        | DYRK1B  | 17 |
| GSK3B                         | GSK3B   | 17 |
| p38-delta                     | MAPK13  | 17 |
| p38-gamma                     | MAPK12  | 17 |
| SRMS                          | SRMS    | 17 |
| EGFR(L858R,T790M)             | EGFR    | 16 |
| ERBB3                         | ERBB3   | 16 |
| KIT(D816H)                    | KIT     | 16 |
| LZK                           | MAP3K13 | 16 |
| PRKCQ                         | PRKCQ   | 16 |
| RPS6KA4(Kin.Dom.2-C-terminal) | RPS6KA4 | 16 |
| RSK2(Kin.Dom.2-C-terminal)    | RPS6KA3 | 16 |
| SRPK2                         | SRPK2   | 16 |
| TAOK3                         | TAOK3   | 16 |
| CDK4-cyclinD3                 | CDK4    | 15 |
| DYRK1A                        | DYRK1A  | 15 |
| MYO3B                         | MYO3B   | 15 |
| PRKD1                         | PRKD1   | 15 |
| RSK2(Kin.Dom.1-N-terminal)    | RPS6KA3 | 15 |
| TAOK1                         | TAOK1   | 15 |
| TAOK2                         | TAOK2   | 15 |
| AURKA                         | AURKA   | 14 |
| CSNK2A2                       | CSNK2A2 | 14 |
| JNK1                          | MAPK8   | 14 |
| LATS1                         | LATS1   | 14 |
| LATS2                         | LATS2   | 14 |
| MAST1                         | MAST1   | 14 |
| PAK2                          | PAK2    | 14 |
| WNK2                          | WNK2    | 14 |
| ABL1-nonphosphorylated        | ABL1    | 13 |
| CDK11                         | CDK19   | 13 |
| CHEK2                         | CHEK2   | 13 |
| GRK7                          | GRK7    | 13 |
| MST4                          | MST4    | 13 |
| NDR1                          | STK38   | 13 |
| NEK4                          | NEK4    | 13 |

|                               |         |    |
|-------------------------------|---------|----|
| PIK3CA                        | PIK3CA  | 13 |
| PIKFYVE                       | PIKFYVE | 13 |
| PRKD2                         | PRKD2   | 13 |
| SIK                           | SIK1    | 13 |
| SNRK                          | SNRK    | 13 |
| TEC                           | TEC     | 13 |
| YSK1                          | STK25   | 13 |
| ALK(L1196M)                   | ALK     | 12 |
| DLK                           | MAP3K12 | 12 |
| ICK                           | ICK     | 12 |
| LTK                           | LTK     | 12 |
| NEK11                         | NEK11   | 12 |
| NIK                           | MAP3K14 | 12 |
| PIK4CB                        | PI4KB   | 12 |
| RIPK5                         | DSTYK   | 12 |
| VEGFR2                        | KDR     | 12 |
| VRK2                          | VRK2    | 12 |
| EGFR(L747-S752del, P753S)     | EGFR    | 11 |
| INSR                          | INSR    | 11 |
| IRAK1                         | IRAK1   | 11 |
| PIK3CA(C420R)                 | PIK3CA  | 11 |
| PRKCE                         | PRKCE   | 11 |
| RSK3(Kin.Dom.1-N-terminal)    | RPS6KA2 | 11 |
| TIE1                          | TIE1    | 11 |
| ALK                           | ALK     | 10 |
| BMX                           | BMX     | 10 |
| FGFR1                         | FGFR1   | 10 |
| FLT3                          | FLT3    | 10 |
| FLT3(D835H)                   | FLT3    | 10 |
| FLT3(K663Q)                   | FLT3    | 10 |
| GRK2                          | ADRBK1  | 10 |
| JAK3(JH1domain-catalytic)     | JAK3    | 10 |
| KIT                           | KIT     | 10 |
| MEK2                          | MAP2K2  | 10 |
| PDGFRA                        | PDGFRA  | 10 |
| PDGFRB                        | PDGFRB  | 10 |
| ABL1(T315I)-nonphosphorylated | ABL1    | 9  |
| ADCK3                         | CABC1   | 9  |
| AXL                           | AXL     | 9  |
| DCAMKL1                       | DCLK1   | 9  |
| EGFR(S752-I759del)            | EGFR    | 9  |
| HIPK2                         | HIPK2   | 9  |
| LIMK2                         | LIMK2   | 9  |
| MAP4K4                        | MAP4K4  | 9  |
| MST1R                         | MST1R   | 9  |
| RIOK2                         | RIOK2   | 9  |
| TLK1                          | TLK1    | 9  |

|                               |          |   |
|-------------------------------|----------|---|
| TSSK1B                        | TSSK1B   | 9 |
| ULK2                          | ULK2     | 9 |
| GRK4                          | GRK4     | 8 |
| LRRK2(G2019S)                 | LRRK2    | 8 |
| MAK                           | MAK      | 8 |
| PLK3                          | PLK3     | 8 |
| RIPK4                         | RIPK4    | 8 |
| RPS6KA5(Kin.Dom.2-C-terminal) | RPS6KA5  | 8 |
| TGFBR2                        | TGFBR2   | 8 |
| BUB1                          | BUB1     | 7 |
| CDC2L1                        | CDK11B   | 7 |
| DAPK1                         | DAPK1    | 7 |
| HIPK1                         | HIPK1    | 7 |
| LOK                           | STK10    | 7 |
| PRKR                          | EIF2AK2  | 7 |
| TNNI3K                        | TNNI3K   | 7 |
| WEE1                          | WEE1     | 7 |
| DCAMKL3                       | DCLK3    | 6 |
| NDR2                          | STK38L   | 6 |
| TIE2                          | TEK      | 6 |
| TRPM6                         | TRPM6    | 6 |
| CLK4                          | CLK4     | 5 |
| DMPK2                         | CDC42BPG | 5 |
| ERK5                          | MAPK7    | 5 |
| MST1                          | STK4     | 5 |
| PFTAIRE2                      | CDK15    | 5 |
| PKN1                          | PKN1     | 5 |
| ROCK2                         | ROCK2    | 5 |
| RSK1(Kin.Dom.2-C-terminal)    | RPS6KA1  | 5 |
| TXK                           | TXK      | 5 |
| AAK1                          | AAK1     | 4 |
| ABL1(E255K)-phosphorylated    | ABL1     | 4 |
| AKT3                          | AKT3     | 4 |
| ALK(C1156Y)                   | ALK      | 4 |
| CAMK2A                        | CAMK2A   | 4 |
| CDKL2                         | CDKL2    | 4 |
| CIT                           | CIT      | 4 |
| EGFR(L858R)                   | EGFR     | 4 |
| EIF2AK1                       | EIF2AK1  | 4 |
| FGFR4                         | FGFR4    | 4 |
| FLT3(D835Y)                   | FLT3     | 4 |
| HCK                           | HCK      | 4 |
| JNK2                          | MAPK9    | 4 |
| KIT(D816V)                    | KIT      | 4 |
| MKNK1                         | MKNK1    | 4 |
| MLCK                          | MYLK3    | 4 |
| MST2                          | STK3     | 4 |

|                               |          |   |
|-------------------------------|----------|---|
| PAK3                          | PAK3     | 4 |
| RIPK2                         | RIPK2    | 4 |
| SIK2                          | SIK2     | 4 |
| AURKB                         | AURKB    | 3 |
| CAMKK2                        | CAMKK2   | 3 |
| CDK5                          | CDK5     | 3 |
| DMPK                          | DMPK     | 3 |
| EPHA8                         | EPHA8    | 3 |
| ERN1                          | ERN1     | 3 |
| IRAK3                         | IRAK3    | 3 |
| MAP4K2                        | MAP4K2   | 3 |
| MAP4K5                        | MAP4K5   | 3 |
| MYLK2                         | MYLK2    | 3 |
| PAK6                          | PAK6     | 3 |
| PIM3                          | PIM3     | 3 |
| RPS6KA4(Kin.Dom.1-N-terminal) | RPS6KA4  | 3 |
| RSK4(Kin.Dom.2-C-terminal)    | RPS6KA6  | 3 |
| AMPK-alpha2                   | PRKAA2   | 2 |
| CAMKK1                        | CAMKK1   | 2 |
| CDKL1                         | CDKL1    | 2 |
| CSK                           | CSK      | 2 |
| EPHA3                         | EPHA3    | 2 |
| EPHB2                         | EPHB2    | 2 |
| NEK7                          | NEK7     | 2 |
| PHKG2                         | PHKG2    | 2 |
| PIM1                          | PIM1     | 2 |
| STK16                         | STK16    | 2 |
| STK39                         | STK39    | 2 |
| TTK                           | TTK      | 2 |
| AMPK-alpha1                   | PRKAA1   | 1 |
| CAMK4                         | CAMK4    | 1 |
| CHEK1                         | CHEK1    | 1 |
| ERBB2                         | ERBB2    | 1 |
| FGFR3                         | FGFR3    | 1 |
| MRCKB                         | CDC42BPB | 1 |
| NEK1                          | NEK1     | 1 |
| NEK2                          | NEK2     | 1 |
| PAK1                          | PAK1     | 1 |
| PIK3CA(E545A)                 | PIK3CA   | 1 |
| PRKCD                         | PRKCD    | 1 |
| SRPK3                         | SRPK3    | 1 |
| TESK1                         | TESK1    | 1 |
| TNIK                          | TNIK     | 1 |
| ZAK                           | ZAK      | 1 |
| ABL1(F317L)-phosphorylated    | ABL1     | 0 |
| ABL1(H396P)-phosphorylated    | ABL1     | 0 |
| ABL1(M351T)-phosphorylated    | ABL1     | 0 |

|                            |          |   |
|----------------------------|----------|---|
| ABL1(T315I)-phosphorylated | ABL1     | 0 |
| ABL1-phosphorylated        | ABL1     | 0 |
| ABL2                       | ABL2     | 0 |
| ACVR1                      | ACVR1    | 0 |
| ACVR1B                     | ACVR1B   | 0 |
| ACVR2A                     | ACVR2A   | 0 |
| ACVR2B                     | ACVR2B   | 0 |
| ACVRL1                     | ACVRL1   | 0 |
| ADCK4                      | ADCK4    | 0 |
| AKT1                       | AKT1     | 0 |
| AKT2                       | AKT2     | 0 |
| ARK5                       | NUAK1    | 0 |
| ASK1                       | MAP3K5   | 0 |
| ASK2                       | MAP3K6   | 0 |
| AURKC                      | AURKC    | 0 |
| BIKE                       | BMP2K    | 0 |
| BLK                        | BLK      | 0 |
| BMPR1A                     | BMPR1A   | 0 |
| BRK                        | PTK6     | 0 |
| BRSK1                      | BRSK1    | 0 |
| CAMK1                      | CAMK1    | 0 |
| CAMK1D                     | CAMK1D   | 0 |
| CAMK1G                     | CAMK1G   | 0 |
| CAMK2B                     | CAMK2B   | 0 |
| CAMK2D                     | CAMK2D   | 0 |
| CAMK2G                     | CAMK2G   | 0 |
| CDC2L2                     | CDC2L2   | 0 |
| CDK2                       | CDK2     | 0 |
| CDK8                       | CDK8     | 0 |
| CDK9                       | CDK9     | 0 |
| CLK1                       | CLK1     | 0 |
| CLK2                       | CLK2     | 0 |
| CLK3                       | CLK3     | 0 |
| CSF1R                      | CSF1R    | 0 |
| CSNK1A1                    | CSNK1A1  | 0 |
| CSNK1A1L                   | CSNK1A1L | 0 |
| CSNK1D                     | CSNK1D   | 0 |
| CSNK1E                     | CSNK1E   | 0 |
| CSNK1G1                    | CSNK1G1  | 0 |
| CSNK1G2                    | CSNK1G2  | 0 |
| CSNK1G3                    | CSNK1G3  | 0 |
| CTK                        | MATK     | 0 |
| DAPK2                      | DAPK2    | 0 |
| DAPK3                      | DAPK3    | 0 |
| DCAMKL2                    | DCLK2    | 0 |
| DDR1                       | DDR1     | 0 |
| DRAK1                      | STK17A   | 0 |



|                           |         |   |
|---------------------------|---------|---|
| DRAK2                     | STK17B  | 0 |
| DYRK2                     | DYRK2   | 0 |
| EGFR                      | EGFR    | 0 |
| EGFR(G719C)               | EGFR    | 0 |
| EGFR(G719S)               | EGFR    | 0 |
| EGFR(L747-E749del, A750P) | EGFR    | 0 |
| EGFR(L747-T751del,Sins)   | EGFR    | 0 |
| EGFR(L861Q)               | EGFR    | 0 |
| EPHA1                     | EPHA1   | 0 |
| EPHA2                     | EPHA2   | 0 |
| EPHA4                     | EPHA4   | 0 |
| EPHA5                     | EPHA5   | 0 |
| EPHA6                     | EPHA6   | 0 |
| EPHB1                     | EPHB1   | 0 |
| EPHB3                     | EPHB3   | 0 |
| EPHB4                     | EPHB4   | 0 |
| EPHB6                     | EPHB6   | 0 |
| ERBB4                     | ERBB4   | 0 |
| ERK1                      | MAPK3   | 0 |
| ERK2                      | MAPK1   | 0 |
| ERK4                      | MAPK4   | 0 |
| ERK8                      | MAPK15  | 0 |
| FAK                       | PTK2    | 0 |
| FER                       | FER     | 0 |
| FES                       | FES     | 0 |
| FGFR2                     | FGFR2   | 0 |
| FGFR3(G697C)              | FGFR3   | 0 |
| FGR                       | FGR     | 0 |
| FLT1                      | FLT1    | 0 |
| FLT3(ITD)                 | FLT3    | 0 |
| FLT3(ITD,F691L)           | FLT3    | 0 |
| FLT3(N841I)               | FLT3    | 0 |
| FLT3-autoinhibited        | FLT3    | 0 |
| FLT4                      | FLT4    | 0 |
| FRK                       | FRK     | 0 |
| FYN                       | FYN     | 0 |
| GCN2(Kin.Dom.2,S808G)     | EIF2AK4 | 0 |
| GSK3A                     | GSK3A   | 0 |
| HASPIN                    | GSG2    | 0 |
| HIPK4                     | HIPK4   | 0 |
| HPK1                      | MAP4K1  | 0 |
| HUNK                      | HUNK    | 0 |
| IGF1R                     | IGF1R   | 0 |
| IKK-epsilon               | IKBKE   | 0 |
| IRAK4                     | IRAK4   | 0 |
| ITK                       | ITK     | 0 |
| JAK1(JH1domain-catalytic) | JAK1    | 0 |

|                           |          |   |
|---------------------------|----------|---|
| JAK2(JH1domain-catalytic) | JAK2     | 0 |
| JNK3                      | MAPK10   | 0 |
| KIT(L576P)                | KIT      | 0 |
| KIT(V559D)                | KIT      | 0 |
| KIT(V559D,T670I)          | KIT      | 0 |
| KIT(V559D,V654A)          | KIT      | 0 |
| LCK                       | LCK      | 0 |
| LIMK1                     | LIMK1    | 0 |
| LKB1                      | STK11    | 0 |
| LRRK2                     | LRRK2    | 0 |
| LYN                       | LYN      | 0 |
| MAP3K4                    | MAP3K4   | 0 |
| MAP4K3                    | MAP4K3   | 0 |
| MAPKAPK2                  | MAPKAPK2 | 0 |
| MARK1                     | MARK1    | 0 |
| MARK2                     | MARK2    | 0 |
| MARK3                     | MARK3    | 0 |
| MARK4                     | MARK4    | 0 |
| MEK6                      | MAP2K6   | 0 |
| MELK                      | MELK     | 0 |
| MERTK                     | MERTK    | 0 |
| MET                       | MET      | 0 |
| MET(M1250T)               | MET      | 0 |
| MET(Y1235D)               | MET      | 0 |
| MLK1                      | MAP3K9   | 0 |
| MLK2                      | MAP3K10  | 0 |
| MLK3                      | MAP3K11  | 0 |
| MRCKA                     | CDC42BPA | 0 |
| MST3                      | STK24    | 0 |
| MTOR                      | MTOR     | 0 |
| MUSK                      | MUSK     | 0 |
| MYLK                      | MYLK     | 0 |
| MYLK4                     | MYLK4    | 0 |
| MYO3A                     | MYO3A    | 0 |
| NEK10                     | NEK10    | 0 |
| NEK3                      | NEK3     | 0 |
| NEK5                      | NEK5     | 0 |
| NEK6                      | NEK6     | 0 |
| NEK9                      | NEK9     | 0 |
| NLK                       | NLK      | 0 |
| p38-alpha                 | MAPK14   | 0 |
| p38-beta                  | MAPK11   | 0 |
| PAK4                      | PAK4     | 0 |
| PAK7                      | PAK7     | 0 |
| PCTK2                     | CDK17    | 0 |
| PCTK3                     | CDK18    | 0 |
| PDPK1                     | PDPK1    | 0 |

|                               |         |   |
|-------------------------------|---------|---|
| PFTK1                         | CDK14   | 0 |
| PHKG1                         | PHKG1   | 0 |
| PIK3CA(M1043I)                | PIK3CA  | 0 |
| PIK3CG                        | PIK3CG  | 0 |
| PIM2                          | PIM2    | 0 |
| PIP5K2B                       | PIP4K2B | 0 |
| PKAC-alpha                    | PRKACA  | 0 |
| PKAC-beta                     | PRKACB  | 0 |
| PKMYT1                        | PKMYT1  | 0 |
| PKN2                          | PKN2    | 0 |
| PLK1                          | PLK1    | 0 |
| PRKCH                         | PRKCH   | 0 |
| PRKD3                         | PRKD3   | 0 |
| PRKG1                         | PRKG1   | 0 |
| PRKX                          | PRKX    | 0 |
| PYK2                          | PTK2B   | 0 |
| RAF1                          | RAF1    | 0 |
| RET                           | RET     | 0 |
| RET(M918T)                    | RET     | 0 |
| RET(V804L)                    | RET     | 0 |
| RET(V804M)                    | RET     | 0 |
| RIOK1                         | RIOK1   | 0 |
| RIOK3                         | RIOK3   | 0 |
| ROS1                          | ROS1    | 0 |
| RPS6KA5(Kin.Dom.1-N-terminal) | RPS6KA5 | 0 |
| RSK1(Kin.Dom.1-N-terminal)    | RPS6KA1 | 0 |
| RSK3(Kin.Dom.2-C-terminal)    | RPS6KA2 | 0 |
| SgK110                        | SgK110  | 0 |
| SGK2                          | SGK2    | 0 |
| SLK                           | SLK     | 0 |
| SRC                           | SRC     | 0 |
| SRPK1                         | SRPK1   | 0 |
| STK33                         | STK33   | 0 |
| STK35                         | STK35   | 0 |
| STK36                         | STK36   | 0 |
| SYK                           | SYK     | 0 |
| TBK1                          | TBK1    | 0 |
| TGFBR1                        | TGFBR1  | 0 |
| TLK2                          | TLK2    | 0 |
| TNK2                          | TNK2    | 0 |
| TYK2(JH1domain-catalytic)     | TYK2    | 0 |
| TYK2(JH2domain-pseudokinase)  | TYK2    | 0 |
| TYRO3                         | TYRO3   | 0 |
| WEE2                          | WEE2    | 0 |
| WNK3                          | WNK3    | 0 |
| WNK4                          | WNK4    | 0 |
| YANK1                         | STK32A  | 0 |

|       |         |   |
|-------|---------|---|
| YANK2 | STK32B  | 0 |
| YANK3 | STK32C  | 0 |
| YES   | YES1    | 0 |
| YSK4  | MAP3K19 | 0 |
| ZAP70 | ZAP70   | 0 |

## 5. Mass Spectrometry Method

Samples were analyzed with a ThermoFisher Q Exactive HF-X (ThermoFisher, Bremen, Germany) mass spectrometer coupled with a Waters Acquity H-class liquid chromatograph system. Samples were introduced via a heated electrospray source (HESI) at a flow rate of 0.6 mL/min. Electrospray source conditions were set as: spray voltage 3.0 kV, sheath gas (nitrogen) 60 arb, auxiliary gas (nitrogen) 20 arb, sweep gas (nitrogen) 0 arb, nebulizer temperature 375 degrees C, capillary temperature 380 degrees C, RF funnel 45 V. The mass range was set to 150-2000 m/z. All measurements were recorded at a resolution setting of 120,000.

Separations were conducted on a Waters Acquity UPLC BEH C18 column (2.1 x 50 mM, 1.7  $\mu$ M particle size). LC conditions were set at 100 % water with 0.1 % formic acid (A) ramped linearly over 9.8 mins to 95 % acetonitrile with 0.1 % formic acid (B) and held until 10.2 mins. At 10.21 mins the gradient was switched back to 100% A and allowed to re-equilibrate until 11.25 mins. Injection volume for all samples was 3  $\mu$ L.

Xcalibur (ThermoFisher, Bremen, Germany) was used to analyze the data. Solutions were analyzed at 0.1 mg/mL or less based on responsiveness to the ESI mechanism. Molecular formula assignments were determined with Molecular Formula Calculator (v 1.2.3). All observed species were singly charged, as verified by unit m/z separation between mass spectral peaks corresponding to the  $^{12}\text{C}$  and  $^{13}\text{C}^{12}\text{C}_{-1}$  isotope for each elemental composition.
